# Supplementary material for: Spain is not different: teaching quantitative courses can also be hazardous to one’s career (at least in undergraduate courses)
Source: PeerJ. 2022 May 31;10:e13456. doi: 10.7717/peerj.13456 (PMC9165602; doi:10.7717/peerj.13456)
Supplement: Supplemental Information 1 [file peerj-10-13456-s001.xlsx]

## Sheet: Degree
Id Group	Field	SET responses	SET (mean)
1	Quantitative Methods	21	8
2	Finance & Accounting	22	8.22727
3	Law	19	9.05263
4	Finance & Accounting	28	5.71429
5	Law	29	9.41379
6	Quantitative Methods	31	5.77419
7	Languages	20	8.55
8	Economy	13	7.46154
9	Int. Relations	19	9.73684
10	Languages	16	9
11	Law	18	9.11111
12	Finance & Accounting	38	8.81579
13	Management	33	7.69697
14	Law	59	8.54237
15	Finance & Accounting	28	8.42857
16	Quantitative Methods	11	9.36364
17	Finance & Accounting	26	7.42308
18	General Contents	49	6.7551
19	Law	15	9.93333
20	Law	34	9.26471
21	Law	39	8.61538
22	Management	37	8.86486
23	Languages	13	9.76923
24	Law	28	9.03571
25	Law	29	8.17241
26	Law	32	9.03125
27	Quantitative Methods	36	6.88889
28	Finance & Accounting	54	7.75926
29	Law	42	7.21429
30	Law	23	7.43478
31	Law	21	8.80952
32	Law	23	8
33	General Contents	41	5.73171
34	Economy	11	8.81818
35	Law	38	8.21053
36	Economy	22	8.18182
37	Management	22	8.59091
38	Economy	31	9.06452
39	Finance & Accounting	32	8.625
40	Law	48	7.91667
41	Law	24	8.5
42	General Contents	11	9.54545
43	Finance & Accounting	49	9.28571
44	Management	30	9.26667
45	Int. Relations	28	8.5
46	Quantitative Methods	36	5.80556
47	Languages	47	8.06383
48	Law	45	8.66667
49	Law	47	6.97872
50	Quantitative Methods	65	8.56923
51	Law	34	7.67647
52	Law	23	8.47826
53	Languages	34	8.5
54	Law	21	7.38095
55	Management	43	8.11628
56	Law	24	8.5
57	Management	20	7.55
58	Finance & Accounting	38	9.18421
59	Finance & Accounting	39	7.02564
60	Finance & Accounting	22	9.68182
61	General Contents	16	9.9375
62	Int. Relations	40	8.8
63	Law	22	8.45455
64	Finance & Accounting	36	9.27778
65	Law	20	8.25
66	Management	46	9.54348
67	Law	35	8.74286
68	Law	22	8.59091
69	Law	24	8.875
70	Law	29	7.48276
71	Economy	19	6.42105
72	Economy	37	9.7027
73	Law	17	7.76471
74	Law	34	8.97059
75	Quantitative Methods	42	4.90476
76	Law	27	9.14815
77	General Contents	16	8.375
78	Economy	26	4.76923
79	Int. Relations	31	7.51613
80	Management	47	7.87234
81	Finance & Accounting	29	9.62069
82	General Contents	42	9.16667
83	Law	46	6.95652
84	Law	23	8.65217
85	General Contents	12	8.41667
86	Finance & Accounting	21	8.85714
87	Economy	31	9.19355
88	General Contents	21	7.47619
89	Law	38	9.31579
90	Law	51	8.7451
91	Finance & Accounting	31	9.06452
92	Finance & Accounting	30	9.16667
93	General Contents	14	8.28571
94	Law	29	7.41379
95	Management	18	8.55556
96	Law	40	6.875
97	General Contents	21	5.33333
98	Law	40	8.325
99	Law	12	9.08333
100	Languages	10	9.2
101	General Contents	24	7.375
102	Finance & Accounting	48	9.08333
103	General Contents	16	9.1875
104	Finance & Accounting	24	6.625
105	Languages	14	8.64286
106	Law	38	8.42105
107	Law	53	4.07547
108	Law	38	8.92105
109	General Contents	22	8.59091
110	Finance & Accounting	22	8.40909
111	Law	42	8.30952
112	Management	38	5.76316
113	Law	29	9
114	Finance & Accounting	10	6.3
115	Law	24	8.66667
116	Finance & Accounting	43	8.25581
117	Law	34	7.38235
118	Marketing	22	7.04545
119	Languages	16	6.625
120	Economy	41	9.21951
121	Law	23	6.6087
122	Finance & Accounting	22	9.18182
123	Quantitative Methods	43	8.30233
124	Law	40	6.675
125	Quantitative Methods	47	5.51064
126	Languages	18	9.66667
127	Finance & Accounting	46	7.93478
128	Marketing	29	7.75862
129	Law	35	9.37143
130	Quantitative Methods	47	7.61702
131	Int. Relations	33	9.54545
132	Law	25	8.6
133	Law	21	8.66667
134	Law	27	8.44444
135	Languages	13	8.84615
136	Quantitative Methods	28	8.92857
137	Management	29	7.31034
138	General Contents	35	9.82857
139	Quantitative Methods	27	6.07407
140	Law	33	8.60606
141	Law	45	8.37778
142	Economy	41	9.21951
143	Finance & Accounting	25	5.16
144	Law	33	7.9697
145	General Contents	22	8.72727
146	General Contents	32	6.78125
147	Quantitative Methods	36	6.55556
148	Law	25	9.16
149	Languages	21	8.7619
150	Law	27	8.81481
151	Management	31	8.67742
152	Law	19	9.05263
153	Management	33	4.18182
154	Law	18	8.44444
155	Law	33	7.45455
156	Law	20	7.2
157	Finance & Accounting	41	6.65854
158	Law	36	8.25
159	Finance & Accounting	16	7
160	Law	34	6.14706
161	Law	16	9.125
162	Marketing	33	5.24242
163	Law	29	7.17241
164	Law	30	8.53333
165	Law	38	7.63158
166	Management	24	4.875
167	Economy	22	7.54545
168	Economy	23	7.52174
169	Marketing	31	7.58065
170	Int. Relations	24	8.54167
171	Finance & Accounting	48	9.6875
172	Finance & Accounting	22	7.54545
173	Law	35	9.4
174	Languages	21	7.71429
175	Management	46	8.45652
176	Languages	18	7.11111
177	Law	30	9.33333
178	Quantitative Methods	22	7.18182
179	Law	15	8
180	Languages	26	7.80769
181	Management	32	8.78125
182	Law	24	8
183	General Contents	13	7
184	Finance & Accounting	29	4.44828
185	Law	25	8.24
186	Management	19	8.42105
187	Int. Relations	39	7.38462
188	Management	33	7.51515
189	Law	27	8.33333
190	Quantitative Methods	22	8.31818
191	Management	47	6.78723
192	Quantitative Methods	37	6.75676
193	Management	29	9.06897
194	Economy	16	9.5625
195	Management	38	8.18421
196	General Contents	22	7.04545
197	Law	18	9.61111
198	Law	43	8.30233
199	Finance & Accounting	11	9.45455
200	General Contents	19	8.78947
201	Economy	30	7.56667
202	Languages	19	8.89474
203	Law	19	9.63158
204	Law	35	9.05714
205	Law	36	6.75
206	Law	28	6.92857
207	Law	33	9.0303
208	Law	37	9.10811
209	Law	19	9.31579
210	Law	43	7.37209
211	Law	43	8.7907
212	Law	10	8.7
213	Law	24	9.45833
214	Int. Relations	25	9.04
215	Int. Relations	27	6.48148
216	Quantitative Methods	42	5.7619
217	Law	29	9.24138
218	General Contents	18	9.22222
219	Languages	28	7.57143
220	Law	22	8.59091
221	Management	33	7.54545
222	Quantitative Methods	45	8.08889
223	Economy	37	7.86486
224	Finance & Accounting	21	7.85714
225	Languages	10	5.2
226	Management	12	8.75
227	Quantitative Methods	59	7.37288
228	Law	19	8.47368
229	Finance & Accounting	27	9.48148
230	General Contents	24	5.16667
231	General Contents	25	6.08
232	Economy	46	7.3913
233	Law	25	6.72
234	Law	19	8.10526
235	Languages	13	7.30769
236	General Contents	42	6.04762
237	General Contents	22	9.59091
238	Finance & Accounting	44	7.40909
239	Quantitative Methods	27	8.48148
240	Finance & Accounting	26	9.03846
241	Law	15	7.33333
242	Quantitative Methods	39	7.07692
243	Law	36	8.97222
244	Int. Relations	20	7.45
245	Law	22	7.63636
246	Law	22	8.27273
247	Quantitative Methods	15	5.93333
248	General Contents	12	9
249	Law	32	5.65625
250	Quantitative Methods	38	6.52632
251	Int. Relations	29	9.24138
252	Finance & Accounting	13	7.61538
253	Management	27	7.11111
254	General Contents	20	8.95
255	Law	32	8.28125
256	Languages	25	6.16
257	Finance & Accounting	19	6.89474
258	Economy	35	9.25714
259	Law	33	7.54545
260	Law	58	6.77586
261	Management	34	8.47059
262	Management	30	9.86667
263	Management	18	8.44444
264	Finance & Accounting	29	8.72414
265	Quantitative Methods	30	6.53333
266	Management	33	8.72727
267	Languages	21	9.42857
268	Finance & Accounting	49	7.97959
269	Law	41	7.80488
270	Law	47	9.2766
271	Management	26	6.46154
272	Economy	20	8.85
273	Finance & Accounting	34	6.52941
274	Management	42	9.19048
275	Law	14	8.78571
276	General Contents	19	9.63158
277	Law	17	7.41176
278	Law	22	8.77273
279	Law	25	8.76
280	Law	35	7.25714
281	Law	40	7.225
282	Law	18	9.05556
283	Languages	15	8.66667
284	Management	24	8.5
285	Quantitative Methods	45	9.35556
286	Languages	24	8.91667
287	Languages	17	8.64706
288	Law	26	6.34615
289	Law	24	9.16667
290	Finance & Accounting	31	8.87097
291	Law	44	8.43182
292	Int. Relations	32	5.34375
293	Finance & Accounting	28	8.14286
294	Languages	11	7.72727
295	General Contents	29	9.17241
296	Management	28	5.71429
297	General Contents	52	7.11538
298	Management	32	5.40625
299	Management	31	7.74194
300	General Contents	48	6.9375
301	Law	10	8.6
302	Languages	23	9.78261
303	Law	43	9.25581
304	General Contents	16	8.8125
305	Languages	22	8.18182
306	Management	34	8.05882
307	Languages	23	8.08696
308	Economy	32	9.59375
309	Management	29	6.75862
310	Languages	19	9.21053
311	Management	18	8.55556
312	Law	25	9.2
313	Finance & Accounting	31	7.03226
314	Law	27	9.48148
315	Law	48	9.4375
316	Law	41	9.5122
317	Law	11	7.36364
318	Law	16	6.3125
319	Int. Relations	21	5.38095
320	Finance & Accounting	28	9.42857
321	General Contents	51	6.86275
322	Languages	25	7.44
323	Law	40	8.125
324	Finance & Accounting	31	7.09677
325	Law	35	8.68571
326	Marketing	24	5.83333
327	General Contents	19	8.57895
328	Finance & Accounting	30	8.36667
329	Int. Relations	11	6.81818
330	Economy	18	7.72222
331	Quantitative Methods	23	7.73913
332	Economy	17	8.70588
333	Management	34	6.76471
334	Languages	25	7.88
335	Economy	46	7.30435
336	Law	20	7.65
337	Law	26	8.42308
338	General Contents	14	7.64286
339	Economy	25	9.08
340	Languages	18	7.16667
341	Quantitative Methods	38	5.97368
342	Languages	21	7.2381
343	Law	45	4
344	Law	18	8.55556
345	Int. Relations	11	8.54545
346	Economy	21	9.38095
347	Law	41	9.41463
348	Law	62	7.64516
349	Law	11	9.45455
350	General Contents	15	9.66667
351	Quantitative Methods	20	7.6
352	Law	34	8.85294
353	Finance & Accounting	47	7.61702
354	Management	28	7.75
355	Law	28	8
356	Law	12	7.33333
357	Quantitative Methods	36	5.36111
358	Marketing	33	7.81818
359	Languages	11	9.36364
360	Law	43	6.46512
361	Law	35	9.08571
362	Law	44	9.59091
363	Management	22	8.27273
364	General Contents	22	6.40909
365	Economy	49	7.44898
366	Law	15	9.66667
367	Law	14	9
368	Int. Relations	18	7.27778
369	Economy	28	9.57143
370	Law	32	8.15625
371	Economy	38	7.10526
372	Finance & Accounting	20	8.3
373	Law	44	8.86364
374	Languages	18	7.77778
375	General Contents	22	8.72727
376	Languages	11	6.09091
377	Law	22	3.36364
378	Management	31	6.80645
379	Marketing	29	9.27586
380	General Contents	10	8.9
381	Management	27	9.37037
382	General Contents	20	8.15
383	Int. Relations	41	5.41463
384	Law	18	8.44444
385	Economy	23	8.52174
386	Finance & Accounting	36	8.80556
387	Economy	22	9
388	Int. Relations	16	6.8125
389	Finance & Accounting	37	8.89189
390	Law	33	8.30303
391	Quantitative Methods	33	6.69697
392	Finance & Accounting	38	8.31579
393	Management	25	7.96
394	Law	21	8.2381
395	Finance & Accounting	16	8.3125
396	Law	51	8.01961
397	Law	14	8.07143
398	Management	23	8.65217
399	Finance & Accounting	24	8.29167
400	Management	40	8.95
401	Quantitative Methods	37	4.75676
402	Finance & Accounting	32	5.8125
403	Quantitative Methods	45	7.8
404	Finance & Accounting	16	9.375
405	Law	26	6.65385
406	Law	36	8.25
407	Law	20	9.55
408	Law	31	8.3871
409	Finance & Accounting	33	9.27273
410	Economy	32	5.90625
411	Law	28	8.32143
412	Law	20	6.65
413	Languages	21	9.52381
414	General Contents	34	6.47059
415	Marketing	34	8.67647
416	Law	27	8.22222
417	Law	12	7.41667
418	Finance & Accounting	39	9.66667
419	Finance & Accounting	12	8.5
420	Int. Relations	57	8.96491
421	Int. Relations	23	7.56522
422	General Contents	14	8.28571
423	Languages	18	8.16667
424	Finance & Accounting	30	7.2
425	Quantitative Methods	33	5.81818
426	Management	28	7.39286
427	Law	46	9.26087
428	Law	43	9.4186
429	Law	26	8.92308
430	Economy	33	6.63636
431	Management	39	8.61538
432	Law	29	8.96552
433	Management	32	7.5625
434	Finance & Accounting	15	9.86667
435	Law	24	7.79167
436	Law	37	7.48649
437	Languages	24	8.375
438	Economy	12	8.33333
439	General Contents	11	9.36364
440	Quantitative Methods	33	6.69697
441	Law	55	9.30909
442	Finance & Accounting	35	8.82857
443	Finance & Accounting	42	8.02381
444	Quantitative Methods	40	6.375
445	General Contents	15	8.8
446	Marketing	12	4.75
447	General Contents	33	9.09091
448	Law	46	8.21739
449	Law	28	4.03571
450	Law	49	7.85714
451	Law	42	8.42857
452	Management	26	9
453	General Contents	25	8.52
454	Law	41	7.85366
455	General Contents	22	9.59091
456	Finance & Accounting	14	8.42857
457	Languages	12	8.58333
458	Economy	27	7.92593
459	Languages	22	7.63636
460	Law	33	7.15152
461	General Contents	14	9.78571
462	Law	21	9.80952
463	Law	15	9.46667
464	General Contents	26	7.5
465	Law	15	7.6
466	Law	27	9.77778
467	Quantitative Methods	35	7.71429
468	Management	30	8.7
469	Management	34	7.88235
470	Languages	19	9.52632
471	Quantitative Methods	25	8.96
472	Finance & Accounting	31	8.70968
473	Languages	19	7.94737
474	Languages	17	6.29412
475	Law	11	9.45455
476	Management	38	9.47368
477	Law	31	9.16129
478	Int. Relations	22	8.95455
479	Law	28	7.92857
480	Law	30	7.8
481	Law	25	7.68
482	Marketing	28	7.39286
483	Law	30	7.6
484	Management	18	6.33333
485	Marketing	18	9.05556
486	Finance & Accounting	31	6.90323
487	Finance & Accounting	38	7.86842
488	Economy	43	8.16279
489	Law	20	8.05
490	Finance & Accounting	23	9.04348
491	Economy	27	5.03704
492	Economy	10	7.9
493	Languages	13	8
494	General Contents	30	7.7
495	Finance & Accounting	50	8
496	General Contents	25	8.76
497	Law	22	8
498	Law	23	7.73913
499	Int. Relations	26	8.69231
500	Finance & Accounting	17	8.17647
501	General Contents	16	8.625
502	General Contents	13	7.76923
503	Economy	11	8.45455
504	Law	15	9.73333
505	Finance & Accounting	33	9.57576
506	Marketing	42	6.92857
507	Law	21	7.57143
508	Law	11	8.36364
509	Finance & Accounting	34	7.97059
510	Law	33	7.9697
511	Law	19	8.89474
512	Law	28	5.92857
513	Int. Relations	47	5.85106
514	Quantitative Methods	51	8
515	Languages	15	6.6
516	Management	34	7.20588
517	Marketing	45	9.84444
518	Law	39	9.38462
519	Law	22	6.86364
520	Finance & Accounting	21	7.47619
521	Quantitative Methods	22	7.59091
522	Law	48	8.70833
523	Finance & Accounting	45	7.33333
524	Languages	31	6.90323
525	Law	24	6.08333
526	Marketing	15	8.46667
527	Management	25	7.96
528	General Contents	23	8.56522
529	Finance & Accounting	29	5.2069
530	Law	27	7.92593
531	Law	37	6.43243
532	Quantitative Methods	19	5.42105
533	Law	19	8.10526
534	Finance & Accounting	21	7.7619
535	Management	14	9.14286
536	Quantitative Methods	48	5
537	Management	35	8.85714
538	General Contents	18	9.16667
539	Languages	10	9.5
540	Law	25	8.04
541	Quantitative Methods	34	6.20588
542	Int. Relations	42	7.61905
543	Finance & Accounting	33	9
544	Law	15	9
545	Law	16	8.8125
546	Law	50	6.24
547	Management	36	6.91667
548	Int. Relations	15	9.33333
549	Law	25	8.24
550	Economy	20	3.8
551	Economy	24	5.45833
552	Languages	24	7.79167
553	Law	34	8
554	Quantitative Methods	37	6.43243
555	Languages	12	7.83333
556	Languages	17	8.70588
557	Economy	37	7.56757
558	Finance & Accounting	43	7.25581
559	Finance & Accounting	12	6.91667
560	Law	55	8.32727
561	Law	40	8.55
562	General Contents	20	6.55
563	Quantitative Methods	24	7.83333
564	Law	14	8.71429
565	Marketing	18	8.83333
566	Marketing	32	8.875
567	General Contents	27	8.11111
568	Law	20	8.1
569	Int. Relations	12	8.16667
570	Finance & Accounting	10	8.1
571	Languages	20	8.9
572	Management	34	8.58824
573	Languages	17	8.52941
574	Quantitative Methods	30	7.13333
575	Management	21	9.28571
576	Economy	36	9.58333
577	General Contents	38	8.63158
578	Management	25	8.8
579	General Contents	16	8
580	Law	32	9.0625
581	Law	42	8.57143
582	Management	23	8.65217
583	Law	13	7.23077
584	Law	16	8.875
585	Quantitative Methods	18	5.55556
586	Law	36	8.69444
587	Finance & Accounting	27	8.81481
588	Quantitative Methods	42	6.83333
589	General Contents	22	9.40909
590	Law	17	9.64706
591	Int. Relations	29	7.10345
592	General Contents	28	7.85714
593	Law	15	8.53333
594	General Contents	46	3.91304
595	Management	42	7.69048
596	Quantitative Methods	45	6.04444
597	Languages	12	8.83333
598	Quantitative Methods	16	7.4375
599	Management	30	8.36667
600	Marketing	22	7.04545
601	General Contents	16	9.1875
602	Quantitative Methods	38	5.89474
603	Law	28	7.03571
604	Law	35	9.17143
605	Law	29	7.48276
606	Finance & Accounting	23	5.34783
607	Law	17	9.94118
608	Law	19	8.21053
609	Law	18	8.05556
610	Management	20	8.1
611	Law	16	8.875
612	General Contents	31	6
613	Languages	10	8.8
614	Law	33	9.27273
615	Law	32	8.09375
616	Management	78	8.32051
617	Law	21	7.2381
618	Management	32	5.84375
619	Marketing	32	7.71875
620	Law	32	6.34375
621	Finance & Accounting	32	7.28125
622	General Contents	11	8.27273
623	Law	30	9.5
624	Law	13	8.46154
625	Management	10	8.9
626	Law	27	8.55556
627	Law	34	8.85294
628	General Contents	23	9.47826
629	General Contents	30	9.3
630	Law	38	7.68421
631	Management	46	6.56522
632	Finance & Accounting	29	8.06897
633	Languages	14	8.78571
634	Law	26	8.30769
635	Economy	40	4.9
636	Finance & Accounting	25	7.88
637	Quantitative Methods	56	5.57143
638	General Contents	45	7.64444
639	Law	26	8.34615
640	Law	29	8.93103
641	Law	47	8.31915
642	Economy	58	6.75862
643	Law	27	8.62963
644	Law	31	7.41935
645	Law	17	9.82353
646	Law	21	7.04762
647	Finance & Accounting	14	9.71429
648	General Contents	47	8.46809
649	Marketing	40	5.5
650	Law	19	9.42105
651	Law	35	9.4
652	Management	40	7.45
653	Law	35	9.54286
654	Quantitative Methods	54	8.09259
655	Law	28	7.46429
656	Languages	13	8.07692
657	Law	51	9.45098
658	Economy	46	9.17391
659	Law	23	9.13043
660	Languages	31	6.96774
661	Economy	47	6.68085
662	Finance & Accounting	30	6.76667
663	Law	28	4.10714
664	Finance & Accounting	36	7.55556
665	Law	24	8.625
666	Management	12	9.83333
667	Law	37	8.32432
668	Int. Relations	18	8.5
669	Law	14	8.21429
670	Law	29	9.62069
671	General Contents	24	9.04167
672	Languages	19	7.84211
673	Int. Relations	38	5.89474
674	Law	10	7.4
675	General Contents	41	5.80488
676	Law	20	5.55
677	Law	35	8.45714
678	Economy	34	9.88235
679	Quantitative Methods	10	8
680	Law	49	7.69388
681	Law	25	8.76
682	Law	28	9.10714
683	Economy	32	4.25
684	General Contents	30	8.63333
685	Law	22	7.45455
686	General Contents	22	7.86364
687	Management	42	8.64286
688	Law	23	9.13043
689	Law	27	9.44444
690	Management	16	8.375
691	Law	34	7.76471
692	General Contents	14	9.28571
693	Languages	18	8.27778
694	Law	20	7.65
695	Law	29	6.62069
696	Law	13	9.30769
697	Law	13	8
698	Economy	18	9.16667
699	General Contents	35	7.11429
700	Finance & Accounting	16	8.3125
701	Law	15	9.26667
702	Law	29	9.48276
703	Int. Relations	21	8.38095
704	Law	28	7.89286
705	General Contents	20	7.95
706	Management	27	7.07407
707	Law	22	8.27273
708	Law	28	7.78571
709	Economy	44	6.68182
710	Quantitative Methods	39	6.64103
711	Finance & Accounting	23	8.26087
712	Languages	10	8.4
713	General Contents	44	7.81818
714	Law	21	7.66667
715	Law	28	7.92857
716	Management	26	5.84615
717	Marketing	24	5.95833
718	Languages	22	9.27273
719	Finance & Accounting	20	7.8
720	Quantitative Methods	23	5.21739
721	Management	26	4.84615
722	General Contents	13	8.46154
723	Management	21	7.90476
724	Law	42	7.71429
725	Economy	34	6.55882
726	Quantitative Methods	30	5.33333
727	Int. Relations	26	7.96154
728	Int. Relations	25	8.64
729	Finance & Accounting	35	9.77143
730	Law	20	9.55
731	Finance & Accounting	32	8.46875
732	Law	13	9.53846
733	Languages	10	8.5
734	Law	31	6.87097
735	General Contents	47	7.25532
736	Quantitative Methods	32	6.25
737	Law	35	6.14286
738	Economy	40	7.975
739	General Contents	18	8.66667
740	Law	43	8.74419
741	Law	30	7.4
742	Law	20	8.55
743	Finance & Accounting	36	6.55556
744	Finance & Accounting	34	7.02941
745	General Contents	19	8.05263
746	Languages	11	9.45455
747	Management	34	8.5
748	Quantitative Methods	22	8.72727
749	Law	27	7.37037
750	Law	30	8.06667
751	Law	15	8.53333
752	Economy	43	7.23256
753	Finance & Accounting	48	8.16667
754	Quantitative Methods	23	8.86957
755	Law	16	8.1875
756	Law	19	7.21053
757	Management	20	6.1
758	Law	23	8.86957
759	General Contents	10	9.1
760	Law	14	7.35714
761	Law	12	8.41667
762	Law	20	7.55
763	Law	20	7.75
764	Law	50	9.1
765	Law	37	8.94595
766	General Contents	46	6.04348
767	General Contents	21	7.95238
768	Quantitative Methods	34	4.97059
769	Finance & Accounting	16	7.125
770	Languages	23	8.47826
771	Quantitative Methods	15	9.33333
772	Economy	31	8.74194
773	Languages	10	7.9
774	Languages	17	8.17647
775	Quantitative Methods	48	8.39583
776	Management	16	7.125
777	Finance & Accounting	46	9.13043
778	Economy	34	8.14706
779	Management	28	8.21429
780	Languages	19	9.21053
781	Law	21	8.66667
782	General Contents	24	9.79167
783	Economy	36	8.58333
784	Int. Relations	41	7.95122
785	Finance & Accounting	12	8.16667
786	Law	31	8.41935
787	Management	34	7.32353
788	Law	35	8.48571
789	General Contents	30	8.96667
790	Law	46	7.04348
791	Management	32	9.6875
792	Law	21	8.80952
793	Finance & Accounting	25	7.6
794	Int. Relations	16	6.6875
795	Law	30	8.9
796	Finance & Accounting	36	6.25
797	Law	47	9.6383
798	Languages	12	9.25
799	Law	24	5.66667
800	Languages	14	9.21429
801	Law	45	9.28889
802	Law	17	8.82353
803	Law	22	9.09091
804	Languages	29	7.2069
805	Management	17	9.41176
806	Management	12	8.16667
807	Finance & Accounting	23	8
808	Languages	25	7
809	Law	10	8.1
810	Law	21	6.28571
811	Economy	34	7.82353
812	Economy	10	9.1
813	General Contents	43	8.67442
814	Finance & Accounting	38	7.92105
815	Int. Relations	33	8.0303
816	Languages	16	9.9375
817	Law	32	9.8125
818	Law	25	8.36
819	Law	35	4.42857
820	General Contents	13	8.61538
821	Finance & Accounting	45	9.06667
822	Marketing	42	8.90476
823	Quantitative Methods	31	7.83871
824	Law	33	8.87879
825	Law	39	8.94872
826	Law	48	9.33333
827	Int. Relations	28	7.96429
828	Marketing	44	8.84091
829	Law	35	9.22857
830	Law	29	8.65517
831	Quantitative Methods	55	8.03636
832	Finance & Accounting	36	9.19444
833	General Contents	33	8.12121
834	Law	12	6.58333
835	Law	30	8.26667
836	General Contents	19	9.42105
837	Law	45	6.51111
838	Languages	19	9.05263
839	Law	31	8.06452
840	Languages	13	9.38462
841	Quantitative Methods	35	7.62857
842	General Contents	47	8.76596
843	Law	23	8.91304
844	Languages	15	8.93333
845	Law	38	8.05263
846	Law	17	8.23529
847	Law	28	9.53571
848	Languages	20	8.85
849	Int. Relations	29	8.31034
850	Finance & Accounting	14	8.71429
851	General Contents	21	7.57143
852	Management	19	9.21053
853	Finance & Accounting	26	9.46154
854	Quantitative Methods	25	6.72
855	Finance & Accounting	21	7.42857
856	Quantitative Methods	36	7.08333
857	Economy	29	7.31034
858	Quantitative Methods	27	7.74074
859	Law	18	7.94444
860	Law	22	7.27273
861	Economy	23	6.91304
862	General Contents	18	8.77778
863	Finance & Accounting	37	6.59459
864	Int. Relations	34	9.58824
865	Law	39	9.02564
866	General Contents	15	8.73333
867	Management	24	8.45833
868	Languages	20	8.95
869	Law	29	6.27586
870	Law	46	9.82609
871	Quantitative Methods	28	5.89286
872	Marketing	23	9.6087
873	Finance & Accounting	10	8.6
874	Law	37	8.21622
875	General Contents	38	8.89474
876	Law	43	8.72093
877	Law	35	8.05714
878	Law	40	8.275
879	Law	36	9.47222
880	Quantitative Methods	54	7.46296
881	Int. Relations	13	7.69231
882	Management	17	8.35294
883	Law	20	8.05
884	Languages	43	8.30233
885	Law	24	8.66667
886	Quantitative Methods	15	7.93333
887	Finance & Accounting	23	8.82609
888	Law	46	9.3913
889	Law	38	8.57895
890	Economy	35	7.25714
891	Law	27	6.66667
892	Economy	41	7.39024
893	General Contents	82	6.80488
894	General Contents	22	5.59091
895	Law	45	9.51111
896	General Contents	15	8.8
897	General Contents	13	9
898	Law	25	8.84
899	Economy	25	9.6
900	Quantitative Methods	25	8.52
901	Law	24	7.95833
902	Economy	54	9.40741
903	Law	27	8.37037
904	Marketing	12	5.66667
905	Law	39	9.51282
906	General Contents	18	8.16667
907	General Contents	25	9.04
908	Finance & Accounting	40	8.625
909	Law	40	8.55
910	Int. Relations	18	9.44444
911	Languages	10	8
912	General Contents	23	8.04348
913	Law	31	8.22581
914	Finance & Accounting	19	6.47368
915	Law	47	4.3617
916	Law	21	8.57143
917	General Contents	23	7.78261
918	Law	40	8.425
919	Marketing	16	9.0625
920	Finance & Accounting	20	9.2
921	Economy	23	7.52174
922	Quantitative Methods	33	5.39394
923	Int. Relations	16	8.5
924	General Contents	25	8.04
925	Int. Relations	30	7.2
926	Int. Relations	23	8.69565
927	Economy	39	8.10256
928	Economy	25	5.6
929	Int. Relations	41	7.97561
930	Law	13	8.69231
931	General Contents	16	7.4375
932	Management	49	8.22449
933	Languages	18	9.22222
934	Marketing	10	9.2
935	Quantitative Methods	21	6.61905
936	Law	27	8.07407
937	Languages	12	9.41667
938	General Contents	45	7.37778
939	Law	14	7
940	Marketing	18	6.77778
941	Law	14	5.92857
942	Languages	27	9.14815
943	Finance & Accounting	30	8.56667
944	Law	22	9.54545
945	Management	43	7.4186
946	Quantitative Methods	30	7.33333
947	Management	34	8
948	Law	13	9.38462
949	Finance & Accounting	18	8.33333
950	Law	42	8.7381
951	Management	33	8.63636
952	Law	11	8.72727
953	Quantitative Methods	29	7.72414
954	Law	16	8.5
955	Languages	20	7.95
956	Law	21	7.7619
957	Economy	27	9.44444
958	Finance & Accounting	41	8.85366
959	Economy	28	9.14286
960	Languages	25	8.84
961	Languages	16	8.125
962	Law	25	7.76
963	Law	14	9.28571
964	Law	30	9.36667
965	Quantitative Methods	37	5.81081
966	Law	22	5.95455
967	Law	21	9.14286
968	Law	42	7.85714
969	Languages	13	9.46154
970	Marketing	38	8.55263
971	Quantitative Methods	36	7.97222
972	Finance & Accounting	28	7.78571
973	Law	19	9.68421
974	Economy	19	8.26316
975	Management	17	9.52941
976	Marketing	16	9.1875
977	Law	20	8.2
978	Law	14	7.85714
979	Law	35	5.37143
980	Law	32	5.75
981	Law	47	9.14894
982	Quantitative Methods	33	8.33333
983	Marketing	25	8.56
984	Languages	19	7.84211
985	Law	40	5.075
986	Marketing	28	6.82143
987	Law	95	7.54737
988	Marketing	14	5.78571
989	General Contents	19	8.89474
990	Law	25	9.28
991	General Contents	46	8.41304
992	General Contents	23	6.47826
993	Languages	21	9.19048
994	Law	25	6.84
995	Law	43	8.69767
996	Finance & Accounting	37	9.02703
997	Finance & Accounting	17	9.52941
998	Economy	19	9.89474
999	Finance & Accounting	21	9.42857
1000	General Contents	38	9.10526
1001	Law	49	8.91837
1002	Languages	18	7.77778
1003	Finance & Accounting	50	8.42
1004	Marketing	31	6.22581
1005	Law	28	9.28571
1006	Law	28	8.89286
1007	General Contents	42	8.71429
1008	Law	22	8.40909
1009	Management	37	6.18919
1010	Law	16	7.8125
1011	Management	52	8.51923
1012	Management	28	9.32143
1013	Finance & Accounting	39	6.17949
1014	Int. Relations	21	8.09524
1015	Law	31	9.3871
1016	Law	19	7.42105
1017	Management	31	9.32258
1018	Law	27	8.92593
1019	General Contents	29	9
1020	Law	16	9.1875
1021	Quantitative Methods	39	7.82051
1022	Law	51	6.68627
1023	Law	29	7.89655
1024	Economy	25	9.28
1025	Law	43	6.83721
1026	Management	19	9.05263
1027	Int. Relations	27	4.22222
1028	Law	49	7.32653
1029	Law	33	8.75758
1030	Economy	28	8.17857
1031	Management	20	8.15
1032	Management	10	9.4
1033	Languages	28	8.82143
1034	Law	10	9.5
1035	Quantitative Methods	44	5.36364
1036	Law	50	9.24
1037	Languages	24	8.45833
1038	Quantitative Methods	38	6.73684
1039	Law	18	8.11111
1040	Management	36	8.63889
1041	Management	32	8.46875
1042	Quantitative Methods	27	8.59259
1043	Law	19	9.52632
1044	Law	23	8.95652
1045	Management	26	8.53846
1046	Law	43	9.90698
1047	Int. Relations	36	8.13889
1048	Languages	23	9.04348
1049	Int. Relations	53	9.45283
1050	Int. Relations	11	8.63636
1051	General Contents	21	8.71429
1052	Quantitative Methods	49	7.81633
1053	Marketing	14	9.42857
1054	Management	22	6.90909
1055	Law	29	7.44828
1056	Law	21	8.19048
1057	Law	42	7.07143
1058	Finance & Accounting	38	7.92105
1059	Law	13	4.92308
1060	Languages	17	9.47059
1061	Marketing	19	7.36842
1062	Languages	26	8.96154
1063	Law	43	9.30233
1064	Int. Relations	32	7.875
1065	Law	38	8.76316
1066	Management	37	8.72973
1067	Marketing	42	6.11905
1068	General Contents	36	7.13889
1069	Languages	11	8.81818
1070	Economy	14	8.07143
1071	Economy	34	9.23529
1072	Finance & Accounting	31	7.6129
1073	Economy	26	9.76923
1074	Law	27	8.62963
1075	Law	30	8.9
1076	Law	46	9.34783
1077	Law	21	6.09524
1078	Law	14	8.64286
1079	Management	14	7.78571
1080	Int. Relations	28	6.5
1081	Law	36	9.33333
1082	Law	35	6.91429
1083	Law	41	9.43902
1084	Management	37	5.97297
1085	Quantitative Methods	37	9.35135
1086	Law	42	8.7619
1087	Law	15	8.86667
1088	Management	37	9.48649
1089	Law	33	9.39394
1090	General Contents	19	9.31579
1091	Languages	17	9.58824
1092	General Contents	21	7.57143
1093	Law	16	8
1094	Economy	16	8.625
1095	Law	25	6.24
1096	Law	32	7.71875
1097	General Contents	14	7.5
1098	Management	19	8.31579
1099	Management	27	8.40741
1100	Quantitative Methods	52	7
1101	Languages	23	7.91304
1102	Finance & Accounting	22	8.22727
1103	Management	25	9.16
1104	Languages	12	8.91667
1105	General Contents	24	8.875
1106	Marketing	27	7.59259
1107	General Contents	16	9.625
1108	Languages	16	8.875
1109	General Contents	10	10
1110	Law	51	8.68627
1111	Finance & Accounting	35	4.2
1112	Quantitative Methods	34	5.97059
1113	Finance & Accounting	44	9.61364
1114	Law	38	7.44737
1115	General Contents	19	8.57895
1116	Law	30	7.23333
1117	Law	27	8.33333
1118	Law	21	8.85714
1119	Management	34	5.47059
1120	Management	30	7.03333
1121	Law	32	9.25
1122	Int. Relations	13	9
1123	Management	24	7.66667
1124	Finance & Accounting	18	7.77778
1125	Law	34	8.35294
1126	Law	23	7.6087
1127	Management	30	8.93333
1128	Languages	11	6.90909
1129	Marketing	28	7.42857
1130	Languages	24	7.75
1131	Law	11	9.54545
1132	Law	20	8.55
1133	General Contents	38	8.89474
1134	Quantitative Methods	31	8.25806
1135	Int. Relations	22	8.59091
1136	Languages	20	8.55
1137	General Contents	63	5.34921
1138	General Contents	36	7.61111
1139	General Contents	12	8.66667
1140	General Contents	25	7.96
1141	Law	20	9.45
1142	Int. Relations	16	8.25
1143	Int. Relations	26	8.19231
1144	Law	36	7.97222
1145	Law	13	9.61538
1146	Economy	32	8.4375
1147	Law	23	9.08696
1148	Quantitative Methods	18	9.27778
1149	Finance & Accounting	40	7.3
1150	Management	39	7.05128
1151	Languages	13	8.15385
1152	General Contents	42	8.83333
1153	Finance & Accounting	31	9.29032
1154	Economy	42	8.69048
1155	Law	34	7.02941
1156	Law	20	8.55
1157	Law	48	6.70833
1158	Law	13	8.69231
1159	General Contents	11	8.81818
1160	Management	26	5.19231
1161	Management	45	8.24444
1162	General Contents	23	8.82609
1163	Int. Relations	13	7.69231
1164	Law	17	6.88235
1165	General Contents	22	8.63636
1166	Economy	18	7.38889
1167	General Contents	28	8.78571
1168	Management	30	5.36667
1169	Law	35	9.22857
1170	Finance & Accounting	50	9.3
1171	Law	21	8.52381
1172	Law	12	9.66667
1173	Int. Relations	22	9.68182
1174	Law	19	8.73684
1175	Law	40	7.7
1176	Law	35	5.25714
1177	Management	12	8.41667
1178	Finance & Accounting	19	6.89474
1179	Management	25	6.32
1180	Law	29	9.55172
1181	Marketing	16	7.5
1182	General Contents	13	5.76923
1183	Law	31	7.6129
1184	General Contents	48	7.6875
1185	Finance & Accounting	28	6.60714
1186	Marketing	35	9.57143
1187	General Contents	28	8.35714
1188	Finance & Accounting	25	8.68
1189	Law	29	9.41379
1190	Int. Relations	20	6.65
1191	Law	19	8.52632
1192	Int. Relations	42	6.54762
1193	Law	42	9.35714
1194	Finance & Accounting	32	7.125
1195	Management	52	8.13462
1196	Economy	30	5.8
1197	Languages	26	9
1198	Management	17	7.11765
1199	Law	42	7.09524
1200	General Contents	50	8.12
1201	Economy	13	9.76923
1202	General Contents	18	9.22222
1203	Int. Relations	20	8.4
1204	Int. Relations	33	4.75758
1205	Finance & Accounting	34	6.08824
1206	Finance & Accounting	14	8.5
1207	Int. Relations	21	7.28571
1208	Economy	30	8.83333
1209	Economy	25	7.12
1210	Languages	21	8.52381
1211	Quantitative Methods	26	6.61538
1212	Economy	42	7.83333
1213	General Contents	27	9.62963
1214	Marketing	31	9.3871
1215	Languages	14	7
1216	Quantitative Methods	19	4.15789
1217	Law	50	6.66
1218	Law	20	8.2
1219	Economy	29	8.96552
1220	Finance & Accounting	56	5.5
1221	Quantitative Methods	26	6
1222	General Contents	45	8.31111
1223	Management	39	8.05128
1224	Law	32	8.53125
1225	Economy	38	7.78947
1226	Law	14	8.35714
1227	Economy	43	7.60465
1228	Languages	13	9.61538
1229	Law	12	7.91667
1230	Law	34	8.70588
1231	Economy	27	8.85185
1232	General Contents	38	6.26316
1233	Economy	37	8.32432
1234	Law	19	8.36842
1235	Quantitative Methods	49	7.83673
1236	Economy	33	7.63636
1237	General Contents	22	9.31818
1238	Economy	37	9.43243
1239	General Contents	15	9
1240	General Contents	24	9.04167
1241	Economy	24	8.79167
1242	Languages	16	9.625
1243	Quantitative Methods	29	8.82759
1244	Economy	24	6.75
1245	General Contents	13	9.69231
1246	Quantitative Methods	34	8.52941
1247	Management	28	9.42857
1248	Finance & Accounting	20	8.3
1249	Law	52	8.53846
1250	Languages	13	8.15385
1251	General Contents	13	7.46154
1252	Law	31	9.54839
1253	General Contents	26	7.61538
1254	Management	28	5.92857
1255	Languages	22	7.95455
1256	Law	30	6.6
1257	Law	31	9.25806
1258	Languages	26	7.61538
1259	General Contents	30	7.56667
1260	Law	20	8.8
1261	Law	12	7.58333
1262	Languages	23	8.6087
1263	Management	39	8.25641
1264	General Contents	22	8.5
1265	Quantitative Methods	34	5.14706
1266	Management	30	8.5
1267	Quantitative Methods	45	7.64444
1268	Quantitative Methods	16	7.25
1269	Law	43	8.37209
1270	Law	13	8.76923
1271	Int. Relations	16	9
1272	Management	49	8.26531
1273	Law	26	7.46154
1274	Economy	24	9.08333
1275	Quantitative Methods	37	4.72973
1276	Quantitative Methods	57	7.85965
1277	Law	35	8.54286
1278	Management	37	7.78378
1279	Languages	28	7.67857
1280	Law	35	7.97143
1281	General Contents	14	5.64286
1282	Law	26	7.57692
1283	Law	24	8.16667
1284	General Contents	23	9
1285	Languages	24	8.08333
1286	Law	42	8.04762
1287	Quantitative Methods	36	6.69444
1288	Management	43	7.83721
1289	Languages	11	9.63636
1290	General Contents	18	7.38889
1291	Quantitative Methods	35	8.68571
1292	Economy	39	9.76923
1293	Law	24	7.83333
1294	Quantitative Methods	29	7.27586
1295	Law	41	9.4878
1296	Law	43	8.27907
1297	Law	22	8.5
1298	Law	11	7.90909
1299	Management	38	7.42105
1300	Languages	20	9.5
1301	Law	24	8.08333
1302	Law	19	7.84211
1303	Languages	26	9.23077
1304	Law	28	6.96429
1305	Marketing	27	5.88889
1306	Management	35	7.22857
1307	General Contents	20	8.95
1308	Languages	15	9.26667
1309	General Contents	87	8.1954
1310	Marketing	18	9.44444
1311	Law	11	9.72727
1312	Law	26	6.5
1313	Finance & Accounting	40	9.35
1314	Quantitative Methods	35	6.17143
1315	Law	23	6.73913
1316	Economy	30	6.86667
1317	Finance & Accounting	38	5.26316
1318	Law	77	8.32468
1319	Economy	12	8.75
1320	Quantitative Methods	36	8.11111
1321	Int. Relations	39	7.74359
1322	Finance & Accounting	35	8.94286
1323	Law	28	8.53571
1324	Languages	37	9.27027
1325	General Contents	39	8.48718
1326	General Contents	22	9.18182
1327	Int. Relations	22	9
1328	Management	32	5.65625
1329	Law	33	8.81818
1330	Law	41	9.14634
1331	General Contents	24	8
1332	Economy	36	9.19444
1333	General Contents	26	6.69231
1334	Economy	50	7.84
1335	Law	11	9.54545
1336	Int. Relations	34	8.70588
1337	Law	28	8.42857
1338	Management	29	6.96552
1339	Economy	33	9.60606
1340	Law	26	8.69231
1341	General Contents	10	10
1342	General Contents	53	6.86792
1343	Law	41	8.87805
1344	Law	42	8.57143
1345	General Contents	16	8.8125
1346	Quantitative Methods	21	6.52381
1347	Law	26	8.65385
1348	Economy	36	3.5
1349	Law	15	8.86667
1350	Finance & Accounting	44	8.77273
1351	General Contents	16	9
1352	Management	23	8.69565
1353	Int. Relations	39	9.64103
1354	Quantitative Methods	56	7.91071
1355	Law	41	9.36585
1356	Law	50	9.26
1357	Finance & Accounting	34	6.85294
1358	Law	36	8.58333
1359	Marketing	39	8.33333
1360	Int. Relations	21	9.33333
1361	Law	32	7.96875
1362	Finance & Accounting	40	9.35
1363	Law	52	9.07692
1364	General Contents	16	8.25
1365	Law	23	7.30435
1366	Quantitative Methods	41	6.85366
1367	Law	14	8.85714
1368	Marketing	40	7.9
1369	Management	25	7
1370	Finance & Accounting	40	8.275
1371	Languages	16	9.5
1372	Law	37	8.83784
1373	Int. Relations	11	6.18182
1374	Law	27	5.92593
1375	Int. Relations	40	6.975
1376	Law	21	6.33333
1377	Law	29	7.55172
1378	Law	24	8.875
1379	General Contents	39	6.82051
1380	Law	42	8.04762
1381	Languages	23	8.56522
1382	Management	24	8
1383	Law	18	8.05556
1384	Languages	22	8.86364
1385	Management	32	8.25
1386	Marketing	26	7.57692
1387	Marketing	37	5.83784
1388	Finance & Accounting	29	9.44828
1389	Quantitative Methods	10	8.7
1390	Law	41	7.46341
1391	Int. Relations	28	5.96429
1392	Law	18	9.44444
1393	Law	50	8.88
1394	General Contents	16	7.8125
1395	Law	19	7.36842
1396	Law	50	8.76
1397	Law	18	8.27778
1398	Law	39	8.38462
1399	Law	25	7.28
1400	Law	28	6.64286
1401	Law	21	8.47619
1402	Marketing	37	6.35135
1403	Marketing	31	9.64516
1404	Finance & Accounting	45	6.62222
1405	Law	33	7.84848
1406	Law	32	9.09375
1407	Law	20	7.65
1408	Law	44	7.45455
1409	Management	23	8.3913
1410	Law	18	7.44444
1411	Management	11	8.54545
1412	Languages	20	5.85
1413	Marketing	14	8.85714
1414	Law	21	7.57143
1415	Languages	12	8.33333
1416	Law	16	5.5
1417	Finance & Accounting	14	6.14286
1418	Quantitative Methods	52	6.76923
1419	Law	18	7.11111
1420	Languages	22	9.04545
1421	Economy	31	6
1422	Law	28	8.60714
1423	Int. Relations	11	9.45455
1424	Law	30	6.06667
1425	Law	37	9.02703
1426	Quantitative Methods	51	8.11765
1427	Marketing	38	7.42105
1428	Law	24	6.91667
1429	Languages	17	8.76471
1430	Quantitative Methods	49	5.73469
1431	Law	25	7.72
1432	Marketing	29	6.7931
1433	Law	23	6.73913
1434	Languages	15	9.53333
1435	Finance & Accounting	43	8.13953
1436	Law	20	8.9
1437	General Contents	46	8.3913
1438	Law	37	6.86486
1439	Law	27	8.96296
1440	Law	14	3.21429
1441	Law	31	9
1442	Finance & Accounting	43	8.97674
1443	General Contents	29	6.96552
1444	Finance & Accounting	23	7.04348
1445	Law	51	7.92157
1446	Law	42	8.47619
1447	Management	23	7.3913
1448	Marketing	46	4.3913
1449	General Contents	18	9.44444
1450	Languages	18	6.94444
1451	Management	45	8.91111
1452	Economy	33	8.75758
1453	General Contents	46	9.47826
1454	Marketing	15	7.86667
1455	Marketing	26	7.92308
1456	Languages	11	8.63636
1457	Law	19	8.68421
1458	Law	13	7.61538
1459	Management	25	5.68
1460	Economy	10	9
1461	General Contents	26	8.57692
1462	Finance & Accounting	45	8.71111
1463	Finance & Accounting	18	8.77778
1464	General Contents	29	9
1465	Quantitative Methods	37	4.83784
1466	Law	12	5.58333
1467	General Contents	12	9.41667
1468	Languages	13	8
1469	Law	30	9.6
1470	Finance & Accounting	28	9.14286
1471	Languages	13	8.61538
1472	Law	36	9.75
1473	General Contents	16	9.3125
1474	Int. Relations	18	7.83333
1475	Int. Relations	23	8.95652
1476	Economy	32	7.03125
1477	General Contents	19	9.15789
1478	Law	24	9
1479	Economy	43	8.67442
1480	Finance & Accounting	26	9.5
1481	Finance & Accounting	12	9.33333
1482	Finance & Accounting	34	6.67647
1483	Int. Relations	34	7.23529
1484	Int. Relations	49	9.2449
1485	Languages	20	8.55
1486	Languages	11	8.81818
1487	Quantitative Methods	27	7.85185
1488	Economy	44	7.88636
1489	Marketing	54	9.05556
1490	Languages	10	9
1491	Law	29	9.27586
1492	Languages	28	8.92857
1493	Law	15	8.46667
1494	Finance & Accounting	38	9.63158
1495	Law	23	8.26087
1496	Law	37	9.02703
1497	Economy	18	7.72222
1498	Languages	12	6.25
1499	Law	15	9.46667
1500	Finance & Accounting	32	4.34375
1501	Law	41	9.4878
1502	Marketing	26	8.76923
1503	Quantitative Methods	29	7.2069
1504	Languages	30	8.8
1505	Law	30	9.2
1506	Finance & Accounting	27	9.33333
1507	Management	25	6.56
1508	Languages	14	7.35714
1509	Languages	25	6.72
1510	Quantitative Methods	22	7.31818
1511	Law	10	6.2
1512	Languages	23	8.73913
1513	Law	22	8.95455
1514	Economy	44	5.02273
1515	Finance & Accounting	23	6.34783
1516	Finance & Accounting	36	8.16667
1517	Law	51	8.52941
1518	General Contents	14	8.28571
1519	Law	23	8.95652
1520	Law	52	8.17308
1521	Languages	13	9.38462
1522	Int. Relations	34	7.70588
1523	General Contents	40	7.025
1524	Law	36	8.08333
1525	General Contents	25	8.76
1526	General Contents	25	8.24
1527	Law	48	6.97917
1528	General Contents	36	7.94444
1529	Management	40	7.925
1530	Languages	15	8.46667
1531	Law	40	4.95
1532	Finance & Accounting	20	7.85
1533	Finance & Accounting	14	8.78571
1534	General Contents	22	8.68182
1535	Law	30	9.46667
1536	Law	28	9.21429
1537	Finance & Accounting	34	9.23529
1538	Management	14	9.28571
1539	Marketing	34	9.05882
1540	Law	30	9.5
1541	General Contents	32	7.75
1542	Finance & Accounting	20	8.45
1543	Law	34	8.47059
1544	General Contents	22	6.5
1545	Languages	16	9
1546	Law	31	7.67742
1547	Finance & Accounting	23	9.47826
1548	Languages	21	7.09524
1549	Finance & Accounting	40	8.2
1550	Languages	14	5.92857
1551	General Contents	48	8.25
1552	Law	44	7.18182
1553	Finance & Accounting	35	9.2
1554	Law	29	9.55172
1555	Law	10	8
1556	Finance & Accounting	36	9.13889
1557	Economy	27	8.25926
1558	General Contents	19	8.68421
1559	Law	18	7.77778
1560	Law	24	5.375
1561	Int. Relations	27	8.03704
1562	General Contents	31	8.74194
1563	Economy	14	6.71429
1564	Law	22	8.86364
1565	Law	43	9.04651
1566	Finance & Accounting	34	9.26471
1567	Economy	20	8.95
1568	Law	33	8.81818
1569	Law	13	9.07692
1570	Law	16	8.125
1571	Finance & Accounting	22	6.54545
1572	Law	13	8.61538
1573	Law	17	8.82353
1574	Law	14	8.5
1575	Int. Relations	19	9.05263
1576	Languages	19	8.57895
1577	Management	30	7.1
1578	Law	51	7.5098
1579	Finance & Accounting	12	8.16667
1580	Law	31	9.12903
1581	Management	16	9.375
1582	Management	22	9.31818
1583	Law	17	8.94118
1584	Law	19	9
1585	Law	22	8.09091
1586	Marketing	30	8.7
1587	Law	31	6.96774
1588	Finance & Accounting	56	8.94643
1589	Languages	16	9.25
1590	Int. Relations	17	9.29412
1591	Finance & Accounting	28	9.10714
1592	Marketing	26	8.46154
1593	Law	11	8.45455
1594	General Contents	24	9.58333
1595	Law	34	9.17647
1596	Marketing	16	4.125
1597	Management	29	8.2069
1598	Quantitative Methods	44	5.61364
1599	General Contents	24	8.75
1600	Law	30	8.76667
1601	Languages	23	9.78261
1602	Economy	25	7.88
1603	Law	17	9.17647
1604	Law	18	7.55556
1605	Finance & Accounting	11	7.81818
1606	Law	41	6.90244
1607	General Contents	30	8.43333
1608	Finance & Accounting	24	8.25
1609	Economy	21	9.47619
1610	Int. Relations	33	7.30303
1611	Management	24	2.125
1612	Law	12	6.58333
1613	Languages	22	7.81818
1614	Int. Relations	20	8.7
1615	Marketing	20	7.4
1616	Law	50	9.44
1617	Management	38	6.86842
1618	Law	36	9.02778
1619	Law	15	9.6
1620	General Contents	18	8.22222
1621	Finance & Accounting	30	5.8
1622	General Contents	29	4.7931
1623	Management	29	7.2069
1624	Management	24	7.75
1625	Management	29	7.93103
1626	Law	62	6
1627	Finance & Accounting	30	7.3
1628	Quantitative Methods	29	7.44828
1629	Int. Relations	37	9.21622
1630	Management	27	8.14815
1631	General Contents	21	8.14286
1632	Economy	40	9.875
1633	Law	32	9.34375
1634	Marketing	47	8.31915
1635	Management	26	8.65385
1636	Law	38	8.71053
1637	Law	55	8.98182
1638	General Contents	15	7.53333
1639	Law	23	8.78261
1640	Finance & Accounting	15	7.2
1641	Languages	20	8.8
1642	Languages	13	9.38462
1643	Law	16	9
1644	Quantitative Methods	40	7.275
1645	Law	13	9.53846
1646	Int. Relations	24	7.58333
1647	Management	28	8.89286
1648	Law	58	9.2069
1649	Finance & Accounting	35	6.62857
1650	Management	28	9.32143
1651	Languages	15	8.8
1652	Law	19	7.78947
1653	Management	16	7.8125
1654	Law	34	7.58824
1655	General Contents	13	8.46154
1656	General Contents	25	5.92
1657	Quantitative Methods	38	6.78947
1658	Quantitative Methods	18	8.77778
1659	Economy	38	7.81579
1660	Marketing	39	5.30769
1661	Languages	23	9.73913
1662	Law	25	8.04
1663	Law	29	6.58621
1664	Marketing	15	9
1665	Law	16	8.3125
1666	Law	25	7.96
1667	Management	19	6.78947
1668	Quantitative Methods	13	7.53846
1669	Quantitative Methods	34	8.97059
1670	Law	39	8.82051
1671	Languages	17	7.52941
1672	Economy	53	8.71698
1673	Economy	37	7.13514
1674	General Contents	20	8.8
1675	Quantitative Methods	51	5.56863
1676	Economy	32	8.8125
1677	Finance & Accounting	35	7.68571
1678	Languages	23	7.6087
1679	Languages	12	8.16667
1680	Law	27	9.37037
1681	Finance & Accounting	23	9.30435
1682	Law	26	8.46154
1683	General Contents	23	9.26087
1684	Law	28	7.32143
1685	Law	36	9
1686	Law	21	8.95238
1687	Law	30	7.4
1688	Quantitative Methods	28	8.46429
1689	Languages	17	8.88235
1690	General Contents	33	8.45455
1691	Economy	40	9.35
1692	General Contents	22	8.68182
1693	Law	43	6.69767
1694	Languages	23	7.82609
1695	Law	45	7.77778
1696	Law	24	6.79167
1697	Law	31	5.77419
1698	Economy	42	9.45238
1699	General Contents	27	4.59259
1700	Finance & Accounting	24	8.33333
1701	Marketing	37	9.51351
1702	Law	31	9.67742
1703	Law	28	6.71429
1704	General Contents	27	8.14815
1705	Languages	20	7.95
1706	Law	14	9.28571
1707	Law	37	7.54054
1708	Languages	22	6.5
1709	General Contents	30	8.53333
1710	Law	35	9.25714
1711	Languages	24	9.20833
1712	Law	33	7.18182
1713	Finance & Accounting	42	6.38095
1714	Law	32	6.46875
1715	Management	29	7.72414
1716	Law	44	8.20455
1717	Marketing	24	8.95833
1718	Law	36	9.33333
1719	Marketing	56	5.69643
1720	Marketing	25	7.56
1721	Law	15	8.73333
1722	Law	24	8.75
1723	Law	30	9
1724	General Contents	47	7.21277
1725	Law	40	9.2
1726	Marketing	26	3.92308
1727	Quantitative Methods	19	7.36842
1728	Law	34	7.5
1729	General Contents	19	9.52632
1730	Law	24	9.29167
1731	Management	35	5.68571
1732	Quantitative Methods	16	5.375
1733	Languages	23	8.47826
1734	Int. Relations	34	9.32353
1735	Law	28	8.32143
1736	General Contents	48	5.64583
1737	Finance & Accounting	32	7.21875
1738	Finance & Accounting	23	9.6087
1739	Law	31	7.58065
1740	General Contents	17	7.47059
1741	General Contents	14	7.85714
1742	Management	24	8.66667
1743	General Contents	15	6.53333
1744	Int. Relations	26	9.38462
1745	Law	19	7.15789
1746	Finance & Accounting	35	5.88571
1747	Law	21	9.28571
1748	Finance & Accounting	28	7.92857
1749	Management	19	8.89474
1750	Law	33	6.48485
1751	Languages	13	8.76923
1752	Finance & Accounting	36	6.41667
1753	General Contents	14	6.14286
1754	Int. Relations	15	6.33333
1755	Finance & Accounting	25	8.24
1756	General Contents	28	8.14286
1757	Quantitative Methods	21	9.80952
1758	Languages	24	7.41667
1759	Languages	11	7.09091
1760	Law	36	8.69444
1761	Law	16	6.375
1762	Law	37	7.7027
1763	General Contents	28	8.03571
1764	Law	33	8.12121
1765	Law	39	9.05128
1766	Law	24	8.125
1767	Management	10	9.3
1768	General Contents	86	8.40698
1769	General Contents	49	7.59184
1770	Law	31	9.41935
1771	Languages	28	9.21429
1772	Finance & Accounting	49	8.32653
1773	Law	17	9.47059
1774	Law	35	7.74286
1775	Finance & Accounting	42	7.92857
1776	Finance & Accounting	44	9.13636
1777	General Contents	20	9.5
1778	Finance & Accounting	19	9.42105
1779	Quantitative Methods	42	7.14286
1780	General Contents	36	7.52778
1781	Management	14	8.57143
1782	Law	26	7.46154
1783	Quantitative Methods	38	9.02632
1784	General Contents	38	7.73684
1785	Finance & Accounting	12	9.08333
1786	Int. Relations	28	8.85714
1787	Languages	11	7
1788	Quantitative Methods	41	7
1789	Quantitative Methods	39	6.84615
1790	Languages	15	9.2
1791	Law	20	6.9
1792	Law	36	7.16667
1793	Languages	41	9.17073
1794	Law	43	8.7907
1795	Management	52	6.76923
1796	Quantitative Methods	32	7.75
1797	General Contents	12	8.58333
1798	General Contents	10	9.1
1799	General Contents	36	5
1800	Law	25	9.12
1801	Law	39	9.41026
1802	Law	63	8.12698
1803	Law	53	7.84906
1804	Marketing	17	8.47059
1805	Law	38	4.60526
1806	Quantitative Methods	13	9.38462
1807	Quantitative Methods	28	5.82143
1808	General Contents	22	8.63636
1809	General Contents	19	7.15789
1810	Law	27	9.2963
1811	Languages	20	9.15
1812	Int. Relations	30	6.8
1813	Economy	29	9.37931
1814	General Contents	17	5.47059
1815	Int. Relations	34	7.73529
1816	Quantitative Methods	16	7
1817	Law	30	8.16667
1818	Marketing	34	6.94118
1819	Law	15	6.33333
1820	Law	40	7.5
1821	Law	31	4.93548
1822	Languages	11	8.72727
1823	Law	21	6.85714
1824	Economy	33	7.81818
1825	Quantitative Methods	40	4.4
1826	Marketing	26	8.96154
1827	Law	18	8.22222
1828	Law	13	8
1829	Management	24	8.29167
1830	Law	36	9.08333
1831	Finance & Accounting	29	8.51724
1832	Quantitative Methods	35	6.02857
1833	Int. Relations	18	7.05556
1834	Marketing	40	8.225
1835	Quantitative Methods	35	5.4
1836	Economy	16	8.3125
1837	General Contents	29	6.37931
1838	Finance & Accounting	23	9.26087
1839	Law	32	8.28125
1840	General Contents	25	9.4
1841	Economy	30	5.83333
1842	Finance & Accounting	15	8.86667
1843	Law	23	9.47826
1844	Economy	19	8.21053
1845	General Contents	29	7.17241
1846	Languages	19	8
1847	General Contents	10	8.2
1848	Law	50	8.66
1849	Finance & Accounting	21	7.42857
1850	Quantitative Methods	32	8.875
1851	Management	47	9.38298
1852	Languages	11	8.18182
1853	Int. Relations	38	9.07895
1854	Finance & Accounting	26	7.38462
1855	Finance & Accounting	44	8.20455
1856	Management	18	8.61111
1857	Law	34	6.64706
1858	Law	22	8.22727
1859	Law	18	9.22222
1860	Law	52	7.98077
1861	Languages	17	8.82353
1862	Finance & Accounting	23	8.43478
1863	Quantitative Methods	39	6.71795
1864	Quantitative Methods	45	8.28889
1865	Law	44	8.13636
1866	Finance & Accounting	22	9.22727
1867	Finance & Accounting	22	9.09091
1868	Int. Relations	37	9.21622
1869	Economy	60	7.01667
1870	Marketing	23	6.30435
1871	Management	39	7.74359
1872	Economy	34	3.76471
1873	Languages	15	8.73333
1874	Marketing	31	4.83871
1875	Law	27	9.40741
1876	General Contents	12	9.5
1877	Law	35	8.42857
1878	Finance & Accounting	30	6.53333
1879	Law	17	8.35294
1880	Int. Relations	37	9.27027
1881	General Contents	25	8.92
1882	Law	15	9.46667
1883	General Contents	22	9.22727
1884	Economy	34	6.94118
1885	Languages	15	8.33333
1886	Law	51	7.78431
1887	Quantitative Methods	13	6.46154
1888	Finance & Accounting	35	8.02857
1889	Quantitative Methods	32	5.40625
1890	Law	31	8.41935
1891	Finance & Accounting	14	5.85714
1892	Law	19	9.68421
1893	Finance & Accounting	11	3.72727
1894	Int. Relations	17	5.82353
1895	General Contents	16	6.875
1896	Finance & Accounting	39	7.97436
1897	Law	25	8.84
1898	Economy	16	9.8125
1899	Law	18	9.16667
1900	Management	23	8.86957
1901	Law	17	9
1902	Finance & Accounting	40	8.65
1903	Law	23	8.30435
1904	Law	35	9.05714
1905	Law	26	9
1906	Law	24	8.70833
1907	Management	37	9.02703
1908	Quantitative Methods	10	9
1909	Law	33	9.18182
1910	Law	23	9.47826
1911	Finance & Accounting	35	6.57143
1912	General Contents	13	8.53846
1913	Int. Relations	15	8.73333
1914	Languages	10	8.7
1915	Management	46	8.91304
1916	Finance & Accounting	36	7.25
1917	Law	22	8.63636
1918	Marketing	31	4.6129
1919	Law	43	8.30233
1920	Quantitative Methods	28	7.28571
1921	Languages	28	8.17857
1922	General Contents	18	9.44444
1923	Management	25	9.08
1924	Quantitative Methods	37	9.05405
1925	Law	28	8.53571
1926	Law	26	8.57692
1927	Languages	19	8.84211
1928	Law	33	6.84848
1929	Quantitative Methods	27	9.88889
1930	Finance & Accounting	29	9.03448
1931	Finance & Accounting	20	5.25
1932	Int. Relations	32	8.4375
1933	General Contents	13	9.15385
1934	Management	31	8.29032
1935	Quantitative Methods	53	7.77358
1936	Law	21	9.47619
1937	Law	48	8.3125
1938	Languages	23	7.73913
1939	Finance & Accounting	21	7.85714
1940	Law	12	7.91667
1941	Marketing	38	9.47368
1942	Law	31	8.19355
1943	Int. Relations	45	9.62222
1944	Law	24	6.875
1945	Law	30	8.7
1946	Int. Relations	28	9.07143
1947	Law	35	7.14286
1948	Management	21	8.2381
1949	Economy	38	8.97368
1950	General Contents	17	6.94118
1951	General Contents	20	9.25
1952	Finance & Accounting	29	6.62069
1953	Law	19	9.31579
1954	Law	28	9.60714
1955	Economy	37	8.83784
1956	Law	38	9.10526
1957	Economy	36	9.47222
1958	Law	23	8.95652
1959	Finance & Accounting	12	8
1960	Languages	23	8.47826
1961	Law	16	9.1875
1962	Law	37	7.43243
1963	Int. Relations	13	8.23077
1964	Law	37	7.64865
1965	Finance & Accounting	35	8.51429
1966	General Contents	54	7.5
1967	Management	15	5.73333
1968	Economy	31	9.06452
1969	Law	36	6.33333
1970	Law	44	8.72727
1971	Int. Relations	20	6.5
1972	Law	38	8.42105
1973	Languages	18	8.16667
1974	Management	37	8.48649
1975	Quantitative Methods	18	7
1976	Economy	53	7.41509
1977	Management	34	8.82353
1978	Management	34	7.55882
1979	Quantitative Methods	18	7.16667
1980	Quantitative Methods	40	7.625
1981	Int. Relations	12	8.91667
1982	Quantitative Methods	34	6.41176
1983	General Contents	20	9.6
1984	Law	37	9.18919
1985	Law	15	8
1986	Economy	23	8.82609
1987	Marketing	32	7.65625
1988	Law	18	9.44444
1989	Finance & Accounting	19	8
1990	Management	14	9.64286
1991	General Contents	16	9.1875
1992	General Contents	48	7.3125
1993	Finance & Accounting	35	9.54286
1994	Management	19	8.57895
1995	Law	38	8.13158
1996	Marketing	27	7.74074
1997	Int. Relations	10	8
1998	Law	38	9.10526
1999	General Contents	28	9.03571
[truncated: 886 more rows]

## Sheet: Master
Id Group	Field	SET responses	SET (mean)
1	Quantitative Methods	17	9.58824
2	Law	16	7.1875
3	Int. Relations	13	9
4	Management	21	6.80952
5	Finance & Accounting	34	8.23529
6	Management	10	9.7
7	Quantitative Methods	10	8.5
8	Finance & Accounting	12	9.58333
9	Management	26	7.84615
10	Management	26	8.38462
11	General Contents	29	8.37931
12	Economy	18	7.16667
13	Management	15	6.66667
14	Finance & Accounting	17	8.94118
15	Finance & Accounting	10	8.9
16	Finance & Accounting	11	7.90909
17	Finance & Accounting	30	9.33333
18	Int. Relations	10	8.9
19	Quantitative Methods	17	9.41176
20	Economy	20	9.65
21	Finance & Accounting	13	9.07692
22	Finance & Accounting	25	9.24
23	Economy	11	9.81818
24	Quantitative Methods	45	8.86667
25	Management	10	8.5
26	Management	17	8.41176
27	Management	31	8.03226
28	Quantitative Methods	19	8.89474
29	General Contents	15	8.2
30	Management	28	7.57143
31	Finance & Accounting	19	9.73684
32	Marketing	17	9.76471
33	Management	17	8.17647
34	Management	24	8.25
35	Finance & Accounting	13	6.61538
36	Management	11	7
37	General Contents	15	8.73333
38	Management	24	9.41667
39	Finance & Accounting	14	9.28571
40	Economy	24	7.75
41	Marketing	17	7.70588
42	Management	14	7.71429
43	Int. Relations	28	9.71429
44	General Contents	18	8.66667
45	Quantitative Methods	32	8.65625
46	Marketing	30	6.23333
47	Finance & Accounting	16	9.75
48	Law	16	7.3125
49	Finance & Accounting	25	8.16
50	Law	11	6.45455
51	Finance & Accounting	19	8.05263
52	Management	22	8.81818
53	Management	24	9.08333
54	Law	12	8.91667
55	Economy	12	6.66667
56	Management	12	8.41667
57	Finance & Accounting	19	8.21053
58	Management	30	9.5
59	Quantitative Methods	12	8
60	Marketing	16	9.6875
61	Management	25	7.64
62	General Contents	10	7.4
63	Management	25	9.48
64	Quantitative Methods	16	9.75
65	General Contents	27	7.55556
66	Finance & Accounting	13	9.61538
67	Management	13	9.38462
68	Law	12	7.58333
69	Finance & Accounting	19	8.36842
70	Finance & Accounting	14	9.85714
71	Int. Relations	10	8.9
72	General Contents	14	8.92857
73	Finance & Accounting	11	9.54545
74	Finance & Accounting	13	7.69231
75	Marketing	14	8.85714
76	Management	11	8.63636
77	Finance & Accounting	11	6.18182
78	Management	17	8.41176
79	General Contents	14	9.07143
80	Finance & Accounting	13	9.76923
81	General Contents	16	6.625
82	Management	20	6.25
83	Quantitative Methods	13	9.76923
84	Finance & Accounting	20	6.8
85	Finance & Accounting	39	8.5641
86	General Contents	23	9.47826
87	Finance & Accounting	19	7.84211
88	Management	25	9.12
89	Marketing	10	9.4
90	Management	13	9.53846
91	Int. Relations	11	9
92	General Contents	14	9.71429
93	Finance & Accounting	11	7.90909
94	General Contents	18	8.72222
95	Quantitative Methods	20	8.45
96	Management	20	3.3
97	Management	15	4.86667
98	Finance & Accounting	23	7.43478
99	Finance & Accounting	10	8.1
100	Quantitative Methods	12	9.33333
101	Management	14	7.28571
102	Finance & Accounting	12	9.08333
103	Economy	29	8.62069
104	Management	18	7.22222
105	General Contents	31	9.41935
106	Finance & Accounting	11	9
107	Law	20	8.15
108	Management	15	7.33333
109	Finance & Accounting	31	9.09677
110	Quantitative Methods	13	8.30769
111	Finance & Accounting	31	8.03226
112	Management	17	8.64706
113	General Contents	25	5.76
114	Management	30	6.86667
115	Finance & Accounting	29	8.13793
116	Finance & Accounting	12	8.75
117	Management	14	9.14286
118	Finance & Accounting	20	9.7
119	General Contents	18	8.83333
120	Finance & Accounting	12	9.91667
121	General Contents	15	7.33333
122	Management	27	7.74074
123	Quantitative Methods	12	9.25
124	Finance & Accounting	35	8.05714
125	Management	24	5.16667
126	Management	11	8.63636
127	Finance & Accounting	23	8.3913
128	Finance & Accounting	24	5.45833
129	General Contents	15	7.13333
130	Marketing	21	9.52381
131	Finance & Accounting	24	8.08333
132	Economy	22	8.22727
133	General Contents	11	9.81818
134	Management	25	8.76
135	Management	11	9.45455
136	Int. Relations	15	9.26667
137	Finance & Accounting	13	9.61538
138	Finance & Accounting	10	8.9
139	Law	11	7.36364
140	Finance & Accounting	13	8.30769
141	Finance & Accounting	16	9.5625
142	Finance & Accounting	21	9.66667
143	General Contents	21	8.90476
144	Management	26	8.73077
145	Management	15	9.13333
146	Management	24	7.41667
147	Finance & Accounting	21	8.19048
148	Finance & Accounting	21	7.57143
149	Law	16	8
150	Management	17	9.64706
151	Finance & Accounting	18	8.11111
152	Finance & Accounting	41	8.95122
153	Law	18	8.72222
154	Int. Relations	10	8.8
155	General Contents	17	7.17647
156	General Contents	15	9.4
157	Management	21	9.14286
158	General Contents	10	9.1
159	Quantitative Methods	21	8.71429
160	Management	10	7.7
161	Quantitative Methods	41	9.04878
162	Marketing	12	8.08333
163	Finance & Accounting	18	9.61111
164	Management	28	9.25
165	Finance & Accounting	16	9.625
166	Management	11	7.45455
167	Economy	12	9.91667
168	Finance & Accounting	33	8.63636
169	Finance & Accounting	14	7.5
170	Marketing	21	8.66667
171	Marketing	18	6.22222
172	Finance & Accounting	20	9.4
173	Management	25	3.6
174	Finance & Accounting	34	6.32353
175	General Contents	16	8.625
176	Quantitative Methods	13	7.46154
177	Management	27	7.74074
178	Int. Relations	10	8.7
179	Law	11	10
180	General Contents	10	7.6
181	General Contents	10	9.1
182	Marketing	11	6.54545
183	Finance & Accounting	15	5.73333
184	Management	15	8.86667
185	Finance & Accounting	11	9.09091
186	Finance & Accounting	28	9.67857
187	Int. Relations	10	8.7
188	Finance & Accounting	20	7.9
189	Management	21	7.52381
190	Economy	19	9.73684
191	Finance & Accounting	13	8.84615
192	Quantitative Methods	28	8.21429
193	Finance & Accounting	10	8.3
194	Quantitative Methods	19	8.84211
195	Management	20	7.65
196	Finance & Accounting	33	9.09091
197	Finance & Accounting	22	9.36364
198	Finance & Accounting	14	8.92857
199	Int. Relations	11	8.90909
200	Finance & Accounting	19	7.15789
201	Law	12	8.08333
202	Law	17	8.35294
203	Finance & Accounting	15	6.2
204	Management	28	8.39286
205	Management	14	7.64286
206	Management	24	7.79167
207	Finance & Accounting	17	9
208	Management	28	5.71429
209	Management	12	9.25
210	Law	14	7.78571
211	Quantitative Methods	12	8.91667
212	Finance & Accounting	17	9.41176
213	Management	16	7.875
214	Management	24	7.41667
215	Finance & Accounting	17	9.76471
216	Law	18	8.77778
217	Finance & Accounting	38	6.84211
218	Law	20	8.95
219	Management	10	8.8
220	Finance & Accounting	13	8.92308
221	Finance & Accounting	13	6.30769
222	Management	11	7.63636
223	Finance & Accounting	21	8.52381
224	Economy	21	9.61905
225	Finance & Accounting	16	9.5625
226	Economy	10	7.6
227	Finance & Accounting	11	9.45455
228	Management	14	8.42857
229	Management	29	9
230	Finance & Accounting	13	9.23077
231	Management	19	9.15789
232	Finance & Accounting	14	9.35714
233	General Contents	23	8.69565
234	Finance & Accounting	13	9.38462
235	Finance & Accounting	16	8.9375
236	Finance & Accounting	16	8.625
237	Quantitative Methods	20	9.25
238	Management	11	8.18182
239	Finance & Accounting	11	6
240	General Contents	30	8.56667
241	Finance & Accounting	13	7.53846
242	General Contents	22	9.13636
243	Economy	11	8.36364
244	Economy	11	9
245	Finance & Accounting	22	9.81818
246	Management	21	9.09524
247	Management	30	7.83333
248	Finance & Accounting	14	7.71429
249	General Contents	12	9.25
250	Finance & Accounting	11	6.18182
251	General Contents	28	8.96429
252	Management	14	9.42857
253	General Contents	11	4.18182
254	Quantitative Methods	10	8.1
255	Management	10	8.3
256	General Contents	22	7.68182
257	Management	21	9
258	Finance & Accounting	19	9.31579
259	Marketing	19	8.68421
260	Management	14	7
261	Int. Relations	12	9.16667
262	Finance & Accounting	25	7.64
263	Economy	18	9.55556
264	General Contents	16	8.1875
265	Management	20	5.45
266	Management	14	9.5
267	Management	27	5.62963
268	Management	10	9.1
269	Finance & Accounting	24	9.45833
270	Quantitative Methods	12	8
271	Finance & Accounting	18	9.77778
272	Law	19	9.15789
273	Management	22	8.77273
274	Finance & Accounting	12	9.75
275	Finance & Accounting	23	9.78261
276	Finance & Accounting	11	9.72727
277	Finance & Accounting	12	9.75
278	Finance & Accounting	13	9
279	Marketing	16	9.0625
280	Management	25	7.4
281	Management	11	9.63636
282	General Contents	17	7.58824
283	Management	30	8.8
284	Management	12	8.25
285	Finance & Accounting	19	8.21053
286	General Contents	16	9.625
287	Management	25	8.48
288	Finance & Accounting	43	9.46512
289	Management	14	9.21429
290	Finance & Accounting	19	9.84211
291	Finance & Accounting	21	8.33333
292	Management	12	7.58333
293	Finance & Accounting	25	8.6
294	Law	21	6.95238
295	Finance & Accounting	18	9.72222
296	Finance & Accounting	15	9.8
297	Management	11	7.27273
298	Management	27	8.59259
299	General Contents	14	8.21429
300	Finance & Accounting	14	9.28571
301	Marketing	18	9.22222
302	Finance & Accounting	13	8.46154
303	Management	20	8.7
304	Finance & Accounting	23	6.73913
305	Finance & Accounting	14	8.57143
306	Finance & Accounting	18	9.72222
307	General Contents	20	9.25
308	Finance & Accounting	19	8.26316
309	Finance & Accounting	13	7
310	Management	19	6.36842
311	Finance & Accounting	12	9.08333
312	Management	16	9.1875
313	Quantitative Methods	25	7.76
314	Finance & Accounting	18	8.11111
315	Quantitative Methods	16	8.6875
316	Marketing	24	8.625
317	Economy	16	9.625
318	Management	29	7.58621
319	Management	12	6.66667
320	Finance & Accounting	25	7.36
321	Finance & Accounting	29	9.13793
322	Marketing	17	8.17647
323	Finance & Accounting	24	7.75
324	Economy	17	8.29412
325	Law	29	8.82759
326	Finance & Accounting	16	5.75
327	General Contents	20	9.65
328	Economy	30	8.2
329	Finance & Accounting	12	9.66667
330	Finance & Accounting	23	8.43478
331	Economy	16	8.8125
332	Finance & Accounting	19	8.26316
333	Finance & Accounting	13	9.53846
334	Management	13	9.38462
335	Finance & Accounting	15	7.53333
336	Quantitative Methods	10	8.7
337	Management	20	8.35
338	Finance & Accounting	11	7.18182
339	Management	29	7.24138
340	Finance & Accounting	22	7.09091
341	Management	17	7.17647
342	Quantitative Methods	15	7.8
343	Economy	10	9
344	Quantitative Methods	13	7.92308
345	Finance & Accounting	14	9.64286
346	Finance & Accounting	10	9.6
347	Economy	13	9.23077
348	Management	13	7.46154
349	Management	17	6.11765
350	Finance & Accounting	12	8.58333
351	Law	21	7.28571
352	Finance & Accounting	17	9.82353
353	Management	14	8.92857
354	Quantitative Methods	21	8.61905
355	General Contents	16	8.3125
356	Marketing	11	7.54545
357	General Contents	10	7.9
358	Finance & Accounting	35	7.65714
359	Management	25	7.56
360	Management	28	9.17857
361	Finance & Accounting	10	5.5
362	Finance & Accounting	14	8.85714
363	Quantitative Methods	11	7.18182
364	Management	16	9.1875
365	Management	12	7.16667
366	General Contents	14	5.21429
367	Finance & Accounting	16	9.125
368	Law	22	9
369	Finance & Accounting	14	7.42857
370	Management	14	7.78571
371	Management	20	7.85
372	Management	23	9.17391
373	Management	25	9.44
374	Marketing	31	8.87097
375	Finance & Accounting	16	9.4375
376	Finance & Accounting	15	9.26667
377	Finance & Accounting	13	8.38462
378	General Contents	15	8.73333
379	Int. Relations	21	9.2381
380	General Contents	16	3.4375
381	Finance & Accounting	11	9.81818
382	Marketing	16	7.375
383	Management	12	9.25
384	General Contents	33	9.24242
385	Management	18	7.38889
386	General Contents	16	9.625
387	Finance & Accounting	20	9.95
388	Marketing	18	6.44444
389	Economy	13	8.61538
390	Quantitative Methods	28	8.35714
391	Quantitative Methods	17	8.82353
392	Finance & Accounting	13	8.30769
393	Management	20	8.95
394	Management	10	7.4
395	Quantitative Methods	18	7.05556
396	Int. Relations	24	5.70833
397	Quantitative Methods	21	6.95238
398	Management	30	8.96667
399	General Contents	18	8.55556
400	General Contents	10	9.5
401	Management	31	7.35484
402	Management	15	8.26667
403	Finance & Accounting	23	8.78261
404	Quantitative Methods	35	8.17143
405	General Contents	32	9.03125
406	Management	14	9.42857
407	Finance & Accounting	15	8.86667
408	Finance & Accounting	28	8.67857
409	Quantitative Methods	33	7.63636
410	Finance & Accounting	42	7.66667
411	Marketing	17	6.82353
412	Finance & Accounting	22	9.04545
413	Management	16	7.875
414	Finance & Accounting	14	6.28571
415	Finance & Accounting	31	8.09677
416	General Contents	15	6.86667
417	Marketing	21	9.04762
418	Quantitative Methods	17	6.82353
419	Finance & Accounting	16	9.4375
420	Marketing	14	9.92857
421	Finance & Accounting	29	9.31034
422	Finance & Accounting	42	9.21429
423	General Contents	11	8.27273
424	Finance & Accounting	13	8.69231
425	Finance & Accounting	12	7.66667
426	Finance & Accounting	31	8.51613
427	Finance & Accounting	16	9.875
428	Management	16	8.25
429	General Contents	16	8.9375
430	Management	10	7.5
431	Management	15	8
432	Finance & Accounting	13	9.76923
433	Finance & Accounting	13	9.30769
434	Finance & Accounting	15	5.73333
435	Finance & Accounting	21	7.90476
436	Management	16	8.4375
437	Law	29	7.7931
438	Law	18	7.22222
439	Marketing	47	8.38298
440	Economy	13	8.46154
441	Finance & Accounting	14	6.85714
442	Int. Relations	18	8.66667
443	Management	18	8.72222
444	Management	11	8
445	Finance & Accounting	23	8.86957
446	Quantitative Methods	11	6.81818
447	Finance & Accounting	14	9.28571
448	Marketing	24	7.58333
449	Marketing	16	9.6875
450	Management	15	6.86667
451	Finance & Accounting	20	8.05
452	Finance & Accounting	23	9.08696
453	Finance & Accounting	22	9.22727
454	Economy	22	9.27273
455	Finance & Accounting	12	5
456	Quantitative Methods	11	8.81818
457	Management	12	8.58333
458	Int. Relations	10	9.1
459	Management	17	9.41176
460	Finance & Accounting	13	9.76923
461	Int. Relations	13	8.61538
462	Management	18	8.05556
463	Management	24	9.20833
464	Finance & Accounting	13	9.30769
465	Finance & Accounting	13	7.53846
466	Management	21	9.71429
467	Finance & Accounting	26	9.92308
468	Finance & Accounting	16	9
469	Management	12	8.83333
470	General Contents	15	9
471	Management	23	8.08696
472	Int. Relations	14	9.14286
473	Finance & Accounting	16	8.8125
474	Economy	28	9.89286
475	Law	20	7.85
476	Finance & Accounting	11	9.18182
477	Economy	10	7.3
478	Finance & Accounting	16	8.875
479	Finance & Accounting	13	9.69231
480	Quantitative Methods	11	6.81818
481	Law	16	7.5
482	Finance & Accounting	11	8.27273
483	General Contents	20	9
484	Int. Relations	10	9.1
485	General Contents	25	3.48
486	Finance & Accounting	32	9.25
487	Management	20	6.55
488	General Contents	24	7.41667
489	Management	13	9.15385
490	Finance & Accounting	26	8.73077
491	Finance & Accounting	31	7.35484
492	Int. Relations	16	5.25
493	Management	16	9.0625
494	Finance & Accounting	22	8.95455
495	Finance & Accounting	26	5.53846
496	Finance & Accounting	39	8.10256
497	General Contents	14	9
498	Finance & Accounting	10	10
499	Marketing	21	8.61905
500	Law	11	8.09091
501	Quantitative Methods	30	7.43333
502	General Contents	16	9.1875
503	Law	32	9.21875
504	Management	11	6.90909
505	Finance & Accounting	14	9.42857
506	Management	11	8.09091
507	Management	10	7.7
508	General Contents	12	6.58333
509	Finance & Accounting	17	6.23529
510	Finance & Accounting	40	9.35
511	Finance & Accounting	17	7.05882
512	Finance & Accounting	15	9.33333
513	Quantitative Methods	11	9.45455
514	Finance & Accounting	13	8.92308
515	Management	28	9.21429
516	Law	26	7.61538
517	General Contents	18	6.33333
518	Management	10	8.2
519	Quantitative Methods	12	8.41667
520	Management	10	4.4
521	Finance & Accounting	14	7.64286
522	Finance & Accounting	15	9.13333
523	Management	11	9.54545
524	Management	11	9.72727
525	Finance & Accounting	10	9.4
526	Marketing	14	6.92857
527	Finance & Accounting	31	9.03226
528	Finance & Accounting	14	9.21429
529	Marketing	16	9.75
530	Finance & Accounting	13	9.23077
531	Economy	15	6.8
532	Finance & Accounting	21	9.04762
533	Management	11	8.63636
534	Finance & Accounting	13	8.76923
535	Finance & Accounting	13	6.53846
536	Quantitative Methods	18	8.16667
537	Quantitative Methods	33	9.09091
538	Management	14	9.42857
539	Management	27	8.62963
540	Finance & Accounting	14	7.5
541	Management	10	7.7
542	Finance & Accounting	18	9.55556
543	Management	11	7.90909
544	General Contents	10	5.9
545	Finance & Accounting	32	8.84375
546	Int. Relations	11	7.36364
547	Quantitative Methods	14	8.64286
548	Finance & Accounting	31	7.19355
549	Finance & Accounting	11	7.72727
550	General Contents	30	8.33333
551	Finance & Accounting	13	7
552	Finance & Accounting	12	8.91667
553	Finance & Accounting	13	9.46154
554	Quantitative Methods	16	8.5625
555	Finance & Accounting	33	8.66667
556	Management	25	8.28
557	General Contents	24	7.95833
558	Management	24	7.79167
559	Quantitative Methods	12	9.33333
560	Finance & Accounting	13	8.92308
561	Management	26	8.65385
562	Quantitative Methods	16	8.6875
563	General Contents	11	8.45455
564	Economy	21	9.33333
565	Marketing	15	9.4
566	General Contents	29	9
567	Quantitative Methods	46	9.13043
568	Management	15	5.2
569	Management	10	7.9
570	Finance & Accounting	24	9.5
571	Finance & Accounting	19	6.47368
572	General Contents	12	4.33333
573	Finance & Accounting	16	9.3125
574	Law	17	7.58824
575	Management	26	9.80769
576	Finance & Accounting	12	6.33333
577	Finance & Accounting	13	9
578	Finance & Accounting	10	8.2
579	Finance & Accounting	34	9.64706
580	Marketing	25	6.84
581	Quantitative Methods	31	8.45161
582	Management	15	4.73333
583	Management	13	7.61538
584	Management	25	7.8
585	Management	10	7
586	Management	20	8.55
587	Marketing	24	6.375
588	General Contents	15	8.73333
589	General Contents	10	9.1
590	Finance & Accounting	20	9.3
591	Finance & Accounting	25	9.68
592	Finance & Accounting	14	9.64286
593	Quantitative Methods	13	7.38462
594	Finance & Accounting	11	9.63636
595	Quantitative Methods	14	9.42857
596	Finance & Accounting	16	9.75
597	Management	24	7.33333
598	Finance & Accounting	37	8
599	Law	31	9
600	Finance & Accounting	12	9
601	Management	18	9.22222
602	Finance & Accounting	32	8.875
603	Finance & Accounting	16	6.8125
604	Finance & Accounting	32	8.46875
605	Int. Relations	20	9.8
606	Finance & Accounting	38	7.52632
607	Finance & Accounting	21	8.19048
608	Quantitative Methods	16	9.0625
609	Finance & Accounting	10	8.5
610	Finance & Accounting	23	9.73913
611	Quantitative Methods	14	9.35714
612	Finance & Accounting	10	9.6
613	Finance & Accounting	11	9.63636
614	Finance & Accounting	30	8.36667
615	Marketing	18	9.66667
616	Quantitative Methods	39	8.12821
617	Finance & Accounting	11	9.90909
618	Management	28	8.21429
619	Finance & Accounting	16	7.25
620	Finance & Accounting	20	9.45
621	Quantitative Methods	14	9
622	Management	15	4.73333
623	Marketing	12	9.25
624	Quantitative Methods	33	8.81818
625	Finance & Accounting	28	9.46429
626	Finance & Accounting	10	7.2
627	Finance & Accounting	41	8
628	Quantitative Methods	16	8.375
629	Economy	16	9.875
630	Finance & Accounting	10	8.1
631	Law	16	6.125
632	Finance & Accounting	25	8.68
633	Finance & Accounting	11	6.81818
634	Finance & Accounting	18	7.72222
635	Management	25	8.8
636	Management	16	8.0625
637	Marketing	25	6.64
638	Management	10	9.6
639	Management	26	9.19231
640	Finance & Accounting	18	9.33333
641	Finance & Accounting	25	7.52
642	Management	17	8.64706
643	Marketing	11	9.09091
644	Finance & Accounting	38	9.65789
645	Finance & Accounting	10	9.5
646	Finance & Accounting	32	9.03125
647	Finance & Accounting	34	8.91176
648	Management	27	8.11111
649	Finance & Accounting	13	7.76923
650	Finance & Accounting	18	7.05556
651	Marketing	19	9.05263
652	Law	16	8.125
653	Management	11	5.54545
654	Management	24	8.04167
655	Management	12	9.58333
656	Marketing	11	7.90909
657	Finance & Accounting	22	3.95455
658	Marketing	18	9.16667
659	General Contents	23	8
660	Finance & Accounting	13	7.69231
661	Finance & Accounting	10	9.9
662	Finance & Accounting	38	8.71053
663	Management	29	7.58621
664	Finance & Accounting	31	8.6129
665	Quantitative Methods	17	8.94118
666	Management	25	9.12
667	Finance & Accounting	13	8.46154
668	Management	10	9.1
669	Management	18	7.83333
670	Management	28	6.75
671	Management	25	9.4
672	Finance & Accounting	17	8.88235
673	Int. Relations	27	9
674	Finance & Accounting	19	8.57895
675	Quantitative Methods	17	9.29412
676	Management	10	3.8
677	Finance & Accounting	11	8.54545
678	General Contents	15	8.6
679	Quantitative Methods	11	9.36364
680	Finance & Accounting	16	6.5
681	Marketing	21	8.61905
682	Quantitative Methods	14	7.85714
683	Management	10	9.6
684	Int. Relations	21	8.90476
685	Finance & Accounting	16	9.5625
686	Management	22	7
687	Finance & Accounting	20	9.2
688	Finance & Accounting	18	6.94444
689	General Contents	12	7
690	Management	17	7.82353
691	Management	23	9.17391
692	General Contents	14	7.07143
693	Marketing	10	9.1
694	Management	21	7.09524
695	Quantitative Methods	29	8.31034
696	Quantitative Methods	26	8.84615
697	Finance & Accounting	16	9.625
698	General Contents	13	9.46154
699	Law	11	7
700	Finance & Accounting	13	8
701	Management	24	9.5
702	Marketing	13	9.84615
703	Finance & Accounting	22	8.13636
704	Finance & Accounting	35	9.65714
705	Management	10	8.9
706	Law	11	9.45455
707	Finance & Accounting	19	8.42105
708	Law	16	7.9375
709	Finance & Accounting	17	9.82353
710	Law	28	8.92857
711	Quantitative Methods	18	7.5
712	Finance & Accounting	33	9.21212
713	Management	26	8.73077
714	Management	24	7.20833
715	Management	31	8.19355
716	Finance & Accounting	37	8.78378
717	Management	10	7.6
718	Finance & Accounting	24	8.75
719	Finance & Accounting	35	9.57143
720	General Contents	14	4.5
721	General Contents	25	8.76
722	Finance & Accounting	15	9.06667
723	Management	15	9.13333
724	Finance & Accounting	28	9.14286
725	Quantitative Methods	10	7.8
726	Finance & Accounting	11	9.09091
727	Finance & Accounting	30	9.36667
728	Management	15	9.86667
729	Management	24	7.75
730	General Contents	13	9.53846
731	Finance & Accounting	19	9.47368
732	Law	11	9.09091
733	Management	12	9.58333
734	Quantitative Methods	21	6.52381
735	Economy	13	9
736	Finance & Accounting	12	5.66667
737	Management	20	8.9
738	General Contents	17	9.47059
739	Economy	17	9.52941
740	Management	10	8.7
741	Management	11	8.72727
742	Finance & Accounting	11	8.72727
743	Quantitative Methods	45	7.62222
744	Finance & Accounting	18	8.72222
745	Quantitative Methods	13	7.07692
746	Management	25	8.64
747	Quantitative Methods	20	8.8
748	Management	18	8.22222
749	Management	22	8.54545
750	Finance & Accounting	24	9.45833
751	Management	10	9.3
752	Marketing	11	4.36364
753	Management	11	9.18182
754	Management	10	7.7
755	Finance & Accounting	19	9.47368
756	Management	32	7.75
757	Management	24	9.625
758	Finance & Accounting	17	8.35294
759	Finance & Accounting	30	9.26667
760	Management	11	9.18182
761	Management	21	7.04762
762	Management	17	9.29412
763	Finance & Accounting	35	6.48571
764	Finance & Accounting	14	6.71429
765	Management	20	9.4
766	General Contents	17	7.94118
767	Management	11	7.36364
768	Economy	11	9.09091
769	Management	15	8.86667
770	Finance & Accounting	16	8.25
771	Law	17	7.17647
772	Finance & Accounting	13	9.92308
773	Management	11	4.18182
774	Quantitative Methods	22	8.72727
775	Management	12	7.83333
776	Finance & Accounting	17	5.23529
777	Quantitative Methods	42	8.69048
778	Marketing	10	8.2
779	Finance & Accounting	18	9.44444
780	Economy	15	8
781	Finance & Accounting	17	8.88235
782	Finance & Accounting	26	8.92308
783	Quantitative Methods	16	8.5625
784	Finance & Accounting	15	5.13333
785	General Contents	25	7.16
786	Finance & Accounting	19	9.26316
787	General Contents	20	8.95
788	Quantitative Methods	19	6.89474
789	Finance & Accounting	13	7.53846
790	Law	12	9.58333
791	General Contents	23	5.52174
792	Management	25	7.92
793	Finance & Accounting	10	8.9
794	Management	27	6.18519
795	Finance & Accounting	46	7.06522
796	Management	29	8.93103
797	Quantitative Methods	37	8.91892
798	Management	30	6.63333
799	Management	25	8.76
800	Management	21	8.80952
801	Marketing	15	8.86667
802	Management	11	6.81818
803	Finance & Accounting	16	8.875
804	Finance & Accounting	19	7.78947
805	Quantitative Methods	13	4.53846
806	Management	14	8.14286
807	Finance & Accounting	11	8.27273
808	General Contents	23	8.13043
809	Quantitative Methods	12	8.75
810	Management	16	4.4375
811	Management	15	7.73333
812	Law	20	9.25
813	Management	13	8.76923
814	Finance & Accounting	20	5.15
815	Quantitative Methods	31	9.06452
816	Quantitative Methods	10	9.3
817	Finance & Accounting	12	8.75
818	General Contents	33	9.18182
819	Finance & Accounting	12	8.91667
820	Management	14	9
821	Law	13	7.46154
822	Economy	10	8.7
823	Finance & Accounting	37	8.64865
824	Law	16	7.125
825	Management	26	8.57692
826	General Contents	22	6.13636
827	Finance & Accounting	13	7.23077
828	Finance & Accounting	11	9.81818
829	Law	11	9.36364
830	Management	16	8.1875
831	Finance & Accounting	31	9.58065
832	Quantitative Methods	11	8.81818
833	Management	16	8.1875
834	Management	13	5
835	Management	12	9.25
836	Finance & Accounting	17	7.41176
837	Finance & Accounting	12	5.58333
838	Management	11	9.63636
839	General Contents	10	8.7
840	Finance & Accounting	10	8.1
841	Finance & Accounting	11	9.09091
842	Marketing	11	8.36364
843	Economy	17	9.41176
844	Management	19	9.15789
845	Management	15	8.8
846	Finance & Accounting	38	9.44737
847	Finance & Accounting	19	7.47368
848	Int. Relations	10	8.7
849	Finance & Accounting	19	7.05263
850	Finance & Accounting	12	7.91667
851	Law	12	8.83333
852	Management	14	5.28571
853	Finance & Accounting	14	9.57143
854	Finance & Accounting	31	5.67742
855	Finance & Accounting	16	9.875
856	Marketing	13	7
857	Quantitative Methods	11	9.45455
858	Quantitative Methods	13	9.69231
859	Finance & Accounting	27	9.81481
860	Management	26	8.07692
861	General Contents	15	9.4
862	Finance & Accounting	19	9.21053
863	Economy	12	8.16667
864	Quantitative Methods	14	9.42857
865	Int. Relations	12	8.5
866	Management	23	8.47826
867	Economy	29	9.55172
868	Finance & Accounting	30	8.96667
869	Law	20	8.95
870	Finance & Accounting	20	6.45
871	Finance & Accounting	19	7.73684

## Sheet: Comp. Degree-Master (Fig 6)
Level	Field	SET responses	SET (mean)
Undergraduate	Quantitative Methods	21	8
Undergraduate	Quantitative Methods	31	5.77419
Undergraduate	Quantitative Methods	36	6.88889
Undergraduate	Quantitative Methods	65	8.56923
Undergraduate	Quantitative Methods	42	4.90476
Undergraduate	Quantitative Methods	43	8.30233
Undergraduate	Quantitative Methods	28	8.92857
Undergraduate	Quantitative Methods	27	6.07407
Undergraduate	Quantitative Methods	36	6.55556
Undergraduate	Quantitative Methods	22	8.31818
Undergraduate	Quantitative Methods	37	6.75676
Undergraduate	Quantitative Methods	59	7.37288
Undergraduate	Quantitative Methods	27	8.48148
Undergraduate	Quantitative Methods	39	7.07692
Undergraduate	Quantitative Methods	15	5.93333
Undergraduate	Quantitative Methods	38	6.52632
Undergraduate	Quantitative Methods	38	5.97368
Undergraduate	Quantitative Methods	20	7.6
Undergraduate	Quantitative Methods	33	6.69697
Undergraduate	Quantitative Methods	37	4.75676
Undergraduate	Quantitative Methods	45	7.8
Undergraduate	Quantitative Methods	40	6.375
Undergraduate	Quantitative Methods	19	5.42105
Undergraduate	Quantitative Methods	34	6.20588
Undergraduate	Quantitative Methods	37	6.43243
Undergraduate	Quantitative Methods	18	5.55556
Undergraduate	Quantitative Methods	39	6.64103
Undergraduate	Quantitative Methods	23	5.21739
Undergraduate	Quantitative Methods	30	5.33333
Undergraduate	Quantitative Methods	22	8.72727
Undergraduate	Quantitative Methods	48	8.39583
Undergraduate	Quantitative Methods	25	6.72
Undergraduate	Quantitative Methods	27	7.74074
Undergraduate	Quantitative Methods	54	7.46296
Undergraduate	Quantitative Methods	15	7.93333
Undergraduate	Quantitative Methods	25	8.52
Undergraduate	Quantitative Methods	33	5.39394
Undergraduate	Quantitative Methods	21	6.61905
Undergraduate	Quantitative Methods	30	7.33333
Undergraduate	Quantitative Methods	36	7.97222
Undergraduate	Quantitative Methods	33	8.33333
Undergraduate	Quantitative Methods	27	8.59259
Undergraduate	Quantitative Methods	34	5.97059
Undergraduate	Quantitative Methods	31	8.25806
Undergraduate	Quantitative Methods	26	6
Undergraduate	Quantitative Methods	29	8.82759
Undergraduate	Quantitative Methods	34	8.52941
Undergraduate	Quantitative Methods	34	5.14706
Undergraduate	Quantitative Methods	37	4.72973
Undergraduate	Quantitative Methods	56	7.91071
Undergraduate	Quantitative Methods	41	6.85366
Undergraduate	Quantitative Methods	10	8.7
Undergraduate	Quantitative Methods	52	6.76923
Undergraduate	Quantitative Methods	49	5.73469
Undergraduate	Quantitative Methods	27	7.85185
Undergraduate	Quantitative Methods	29	7.2069
Undergraduate	Quantitative Methods	29	7.44828
Undergraduate	Quantitative Methods	40	7.275
Undergraduate	Quantitative Methods	18	8.77778
Undergraduate	Quantitative Methods	28	8.46429
Undergraduate	Quantitative Methods	19	7.36842
Undergraduate	Quantitative Methods	38	9.02632
Undergraduate	Quantitative Methods	39	6.84615
Undergraduate	Quantitative Methods	28	5.82143
Undergraduate	Quantitative Methods	16	7
Undergraduate	Quantitative Methods	40	4.4
Undergraduate	Quantitative Methods	35	5.4
Undergraduate	Quantitative Methods	32	8.875
Undergraduate	Quantitative Methods	39	6.71795
Undergraduate	Quantitative Methods	13	6.46154
Undergraduate	Quantitative Methods	28	7.28571
Undergraduate	Quantitative Methods	37	9.05405
Undergraduate	Quantitative Methods	18	7.16667
Undergraduate	Quantitative Methods	40	7.625
Undergraduate	Quantitative Methods	20	6.15
Undergraduate	Quantitative Methods	22	7.45455
Undergraduate	Quantitative Methods	46	6.97826
Undergraduate	Quantitative Methods	27	5
Undergraduate	Quantitative Methods	26	6.46154
Undergraduate	Quantitative Methods	17	5.23529
Undergraduate	Quantitative Methods	22	7.59091
Undergraduate	Quantitative Methods	32	7.25
Undergraduate	Quantitative Methods	17	8
Undergraduate	Quantitative Methods	46	7.82609
Undergraduate	Quantitative Methods	32	7.625
Undergraduate	Quantitative Methods	36	4.72222
Undergraduate	Quantitative Methods	24	8.375
Undergraduate	Quantitative Methods	35	9.11429
Undergraduate	Quantitative Methods	33	6.54545
Undergraduate	Quantitative Methods	47	8.85106
Undergraduate	Quantitative Methods	20	7.95
Undergraduate	Quantitative Methods	25	8.08
Undergraduate	Quantitative Methods	38	7.81579
Undergraduate	Quantitative Methods	48	8.41667
Undergraduate	Quantitative Methods	43	9.09302
Undergraduate	Quantitative Methods	19	7.26316
Undergraduate	Quantitative Methods	39	6.33333
Undergraduate	Quantitative Methods	20	5.25
Undergraduate	Quantitative Methods	27	8.07407
Undergraduate	Quantitative Methods	39	5.38462
Undergraduate	Quantitative Methods	15	5.66667
Undergraduate	Quantitative Methods	16	7.4375
Undergraduate	Quantitative Methods	21	4.90476
Undergraduate	Quantitative Methods	19	5.21053
Undergraduate	Quantitative Methods	31	6.83871
Undergraduate	Quantitative Methods	36	9.13889
Undergraduate	Quantitative Methods	15	6.86667
Undergraduate	Quantitative Methods	20	8.15
Undergraduate	Quantitative Methods	14	7.57143
Undergraduate	Quantitative Methods	41	8.97561
Undergraduate	Quantitative Methods	38	6.89474
Undergraduate	Quantitative Methods	37	7.62162
Master	Quantitative Methods	17	9.58824
Master	Quantitative Methods	10	8.5
Master	Quantitative Methods	17	9.41176
Master	Quantitative Methods	45	8.86667
Master	Quantitative Methods	19	8.89474
Master	Quantitative Methods	32	8.65625
Master	Quantitative Methods	16	9.75
Master	Quantitative Methods	13	9.76923
Master	Quantitative Methods	20	8.45
Master	Quantitative Methods	13	8.30769
Master	Quantitative Methods	12	9.25
Master	Quantitative Methods	21	8.71429
Master	Quantitative Methods	41	9.04878
Master	Quantitative Methods	13	7.46154
Master	Quantitative Methods	28	8.21429
Master	Quantitative Methods	12	8.91667
Master	Quantitative Methods	20	9.25
Master	Quantitative Methods	10	8.1
Master	Quantitative Methods	25	7.76
Master	Quantitative Methods	16	8.6875
Master	Quantitative Methods	10	8.7
Master	Quantitative Methods	15	7.8
Master	Quantitative Methods	13	7.92308
Master	Quantitative Methods	21	8.61905
Master	Quantitative Methods	28	8.35714
Master	Quantitative Methods	17	8.82353
Master	Quantitative Methods	18	7.05556
Master	Quantitative Methods	35	8.17143
Master	Quantitative Methods	33	7.63636
Master	Quantitative Methods	11	8.81818
Master	Quantitative Methods	11	6.81818
Master	Quantitative Methods	30	7.43333
Master	Quantitative Methods	11	9.45455
Master	Quantitative Methods	18	8.16667
Master	Quantitative Methods	33	9.09091
Master	Quantitative Methods	14	8.64286
Master	Quantitative Methods	16	8.5625
Master	Quantitative Methods	12	9.33333
Master	Quantitative Methods	16	8.6875
Master	Quantitative Methods	46	9.13043
Master	Quantitative Methods	31	8.45161
Master	Quantitative Methods	13	7.38462
Master	Quantitative Methods	16	9.0625
Master	Quantitative Methods	14	9.35714
Master	Quantitative Methods	39	8.12821
Master	Quantitative Methods	14	9
Master	Quantitative Methods	33	8.81818
Master	Quantitative Methods	16	8.375
Master	Quantitative Methods	17	8.94118
Master	Quantitative Methods	17	9.29412
Master	Quantitative Methods	29	8.31034
Master	Quantitative Methods	26	8.84615
Master	Quantitative Methods	18	7.5
Master	Quantitative Methods	10	7.8
Master	Quantitative Methods	21	6.52381
Master	Quantitative Methods	45	7.62222
Master	Quantitative Methods	13	7.07692
Master	Quantitative Methods	20	8.8
Master	Quantitative Methods	42	8.69048
Master	Quantitative Methods	16	8.5625
Master	Quantitative Methods	37	8.91892
Master	Quantitative Methods	12	8.75
Master	Quantitative Methods	31	9.06452
Master	Quantitative Methods	11	9.45455
Master	Quantitative Methods	13	9.69231
